# Supplementary material for: Does contact with a podiatrist prevent the occurrence of a lower extremity amputation in people with diabetes? A systematic review and meta-analysis
Source: PubMed Central journal article supplement — BMJ Open. 2013 May 4;3(5):e002331. doi: 10.1136/bmjopen-2012-002331 (PMC3651976; doi:10.1136/bmjopen-2012-002331), 2013-05-04
Supplement: bmjopen-2012-002331.draft_revisions.pdf [file bmjopen-2012-002331.draft_revisions.pdf]

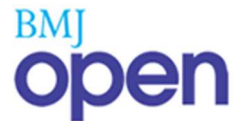

**Does contact with a podiatrist prevent the occurrence of a lower extremity amputation in people with diabetes? A systematic review and meta-analysis**

|                                 |                                                                                                                                                                                                                                                                              |
|---------------------------------|------------------------------------------------------------------------------------------------------------------------------------------------------------------------------------------------------------------------------------------------------------------------------|
| Journal:                        | <i>BMJ Open</i>                                                                                                                                                                                                                                                              |
| Manuscript ID:                  | bmjopen-2012-002331                                                                                                                                                                                                                                                          |
| Article Type:                   | Research                                                                                                                                                                                                                                                                     |
| Date Submitted by the Author:   | 10-Nov-2012                                                                                                                                                                                                                                                                  |
| Complete List of Authors:       | Buckley, Claire; UCC,<br>Perry, Ivan; University College Cork, Department of Epidemiology and Public Health<br>Bradley, Colin; University College Cork, Dept of General Practice<br>Kearney, Patricia; University College Cork, Department of Epidemiology and Public Health |
| <b>Primary Subject Heading</b>: | Diabetes and endocrinology                                                                                                                                                                                                                                                   |
| Secondary Subject Heading:      | Health services research, Evidence based practice                                                                                                                                                                                                                            |
| Keywords:                       | Diabetic foot < DIABETES & ENDOCRINOLOGY, VASCULAR SURGERY, Organisation of health services < HEALTH SERVICES ADMINISTRATION & MANAGEMENT                                                                                                                                    |
|                                 |                                                                                                                                                                                                                                                                              |

SCHOLARONE™  
Manuscripts

Only

1  
2  
3  
4  
5 **DOES CONTACT WITH A PODIATRIST PREVENT THE OCCURRENCE OF A**  
6 **LOWER EXTREMITY AMPUTATION IN PEOPLE WITH DIABETES? A SYSTEMATIC**  
7 **REVIEW AND META-ANALYSIS**  
8  
9

10  
11 **Short title**

12 Contact with podiatry and lower extremity amputation in people with diabetes

13  
14 CM BUCKLEY (CMB)<sup>1,2</sup>, IJ PERRY (IJP)<sup>2</sup>, CP BRADLEY (CPB)<sup>1</sup>, PM KEARNEY (PMK)<sup>2</sup>  
15

16 1. Dept of General Practice, UCC, Western Gateway Building, Cork, Ireland

17 2. Dept of Epidemiology and Public Health, UCC, Western Gateway Building, Cork, Ireland,  
18

19  
20 **Corresponding author**

21 Claire Buckley, Department of General Practice, Room 2.57, Western Gateway Building, University  
22 College Cork, Ireland

23 Tel No: 00353 86 6020313, Fax No: 00353 21 4205469,

24 Email: Claire.buckley@ucc.ie  
25

26  
27 **Keywords**

28 Podiatry, Amputation, Diabetes Mellitus, Systematic Review, Meta-analysis  
29

30  
31 **Word Count**

32 Abstract: 300 words

33 Main text: 2,683 words (excluding title page, abstract, references, figures, tables and appendices)  
34  
35  
36  
37  
38  
39  
40  
41  
42  
43  
44  
45  
46  
47  
48  
49  
50  
51  
52  
53  
54  
55  
56  
57  
58  
59  
60

## ABSTRACT

### Objective

To determine the effect of contact with a podiatrist on the occurrence of lower extremity amputation in people with diabetes.

### Design & data sources

We conducted a systematic review of available literature on the effect of contact with a podiatrist on the risk of lower extremity amputation in people with diabetes. Eligible studies, published in the English language, were identified through searches of PUBMED, CINAHL, EMBASE, and Cochrane databases. The key terms, 'podiatry', 'amputation' and 'diabetes', were searched as MeSH (Medical Subject Heading) terms. Reference lists of selected papers were hand-searched for additional eligible articles. No date restrictions were imposed.

### Study Selection

Published randomised and analytical observational studies of the effect of contact with a podiatrist on the risk of LEA in people with diabetes were included. Cross-sectional studies, review articles, chart reviews and case series were excluded. Two reviewers independently assessed titles, abstracts, and full articles to identify eligible studies and extracted data related to study design, characteristics of participants, interventions and outcomes, control for potential confounding factors and risk estimates.

### Analysis

Meta-analysis was performed separately for randomised and non-randomised studies. Relative risks with 95% confidence intervals were estimated with fixed and random effects models as appropriate.

### Results

Six studies met the inclusion criteria and five provided data included in meta-analysis. The identified studies were heterogenous in design and included people with diabetes at both low and high risk of amputation. Contact with a podiatrist did not significantly affect the RR of LEA in a meta-analysis of available data from RCTs; (1.4, 95% CI 0.2-9.8, 2 RCTs) or from cohort studies; (0.7, 95% CI 0.4-1.3, 3 Cohort studies with 4 substudies in one cohort).

### Conclusions

There is very limited data available on the effect of contact with a podiatrist on the risk of LEA in people with diabetes.

## ARTICLE SUMMARY

### Article Focus

- People with diabetes are at increased risk of LEA (Lower Extremity Amputation). As the prevalence of diabetes escalates worldwide, it is anticipated that there will be an increase in the number of LEAs.
- It is assumed that contact with a podiatrist prevents the occurrence of a LEA.
- This systematic review aims to determine from available literature the documented effect of contact with a podiatrist on the occurrence of a LEA in people with diabetes.

### Key Messages

- Very limited data is available and the authors conclude that there is insufficient evidence to determine whether contact with a podiatrist has an effect on the risk of LEA in people with diabetes.
- Some existing studies suggest that contact with a podiatrist has a positive effect on shorter term outcomes including patient knowledge of foot care and ulcer recurrence.
- Further research on the long-term outcome of LEA is warranted.

### Strengths and Limitations

- This is the first systematic review which investigates if contact with a podiatrist prevents the occurrence of a LEA in people with diabetes.
- Failure to demonstrate an effect on this long-term outcome is most likely due to limitations of available studies.
- Limitations include that studies in this systematic review looked at different sample populations ranging from patients with low baseline risk to patients with active disease. Also, included RCTs were underpowered to detect a significant difference for the outcome of LEA.

## INTRODUCTION

A worldwide diabetes epidemic is unfolding[1]. Diabetes is associated with a significantly increased risk of LEA (Lower Extremity Amputation). LEA rates vary between populations with estimates ranging from 46 to 9,600 per 10<sup>5</sup> people with diabetes [2]. A number of factors influence the occurrence of a LEA in people with diabetes; including hypertension, obesity and hyperglycaemia [3 4]. In the foot, previous ulceration, infection and ischaemia are proven risk factors [5]. Nearly 85% of amputations begin as foot ulcers among persons with diabetes [6]. Protective factors include control of clinical parameters and screening to identify those people at high risk and many LEAs are preventable [7] [8]. The effects of clinical and socio-demographic risk factors on the occurrence of a LEA have been well documented in people with diabetes [9] [10] [11] [12].

In 2008, a task force report by the Foot Care Interest Group of the American Diabetes Association, which included podiatrists, stated that all people with diabetes should be assigned to a foot risk category [13]. These categories were designed to direct referral to and subsequent therapy by a speciality clinician or team but did not refer specifically to the role of podiatry. Recent guidelines from Scotland outline a diabetic risk stratification and triage tool, highlighting which people need podiatry referral. According to these guidelines, all patients classified as moderate risk (i.e. at least one risk factor present), severe risk or with active disease require podiatry review [14]. Podiatry is practiced as a speciality in many countries and in many English-speaking countries, the older term of "chiropodist" may still be used. According to the National Health Service in the UK, there is no difference between a chiropodist and a podiatrist [15]. It is assumed that podiatrists prevent LEAs by treating existing disease and educating people with diabetes on proper foot care. However, the effect of patient contact with a podiatrist on the risk of LEA in people with diabetes is unproven.

Two previous Cochrane reviews by Dorresteijn et al have looked at firstly the effect of an integrated care approach and secondly the effect of patient education on the outcome of LEA in people with diabetes [16 17]. The first of these reviews found no high quality evidence evaluating an integrated care approach and insufficient evidence of benefit in preventing diabetic foot ulceration [16]. The second review, updated in 2012, concluded that there is insufficient robust evidence that limited patient education alone is effective in achieving clinically relevant reductions in ulcer and LEA incidence [17]. Individual patient contact with a podiatrist was not examined as an intervention in either review. The present systematic review of published literature examines the effect of contact with a podiatrist on risk of LEA in people with diabetes.

## METHODS

The research question, inclusion and exclusion criteria and proposed methods of analysis were specified in advance and documented in a protocol (attached as supplementary file).

### Search Strategy

Pubmed, CINAHL, EMBASE (Excerpta Medica), and Cochrane databases were searched to identify relevant studies published up to and including September 25<sup>th</sup> 2011. The key terms, 'podiatry', 'amputation' and 'diabetes', were searched as MeSH (Medical Subject Heading) terms. Randomised and observational studies, published in English, which reported the effect of contact with a

1  
2  
3 podiatrist on risk of LEA in people with diabetes (type 1 or 2), were included. No date restrictions  
4 were imposed. Cross-sectional studies, review articles, non-systematic reviews, chart reviews and  
5 case series were excluded. A manual search of references cited in relevant articles was performed.  
6 All potentially eligible studies were independently reviewed by two authors (CMB and PMK).  
7  
8

### 9 **Data abstraction and quality assessment:**

10 Using a standardised data collection form, two reviewers (CMB, PMK) independently abstracted  
11 information on study design, year of study, characteristics of participants, interventions and  
12 outcomes, control for potential confounding factors and risk estimates. A modified version of a  
13 checklist developed by Downs and Black for assessing the methodological quality of both  
14 randomised and non-randomised studies of health care interventions was used to critically appraise  
15 the studies in this review [18]. Inconsistencies between reviewers were discussed and resolved  
16 through consensus.  
17  
18

### 19 **Statistical Analysis**

20 Review Manager Software Version 5 (Revman 5.0; the Cochrane Collaboration, Oxford, England) and  
21 STATA Version 12IC were used for statistical analysis. The RR (relative risk) with 95% CI was recorded  
22 for included studies. One study presented individual results for four various stages of disease so this  
23 study was analysed as 4 substudies. Meta-analysis was performed separately for randomised and  
24 non-randomised studies, using either the fixed or random effects model as appropriate. Statistical  
25 heterogeneity was assessed with Cochran's *Q* statistic. Cochran's *Q* is computed by summing the  
26 squared deviations of each study's estimate from the overall meta-analytic estimate, weighting each  
27 study's contribution in the same manner as in the meta-analysis. *P* values were obtained by  
28 comparing the statistic with a  $\chi^2$  distribution with  $k-1$  degrees of freedom (where  $k$  is the number of  
29 studies)[19]. To assess publication bias, a funnel plot of the overall estimate and its standard error  
30 (SE) was derived.  
31  
32  
33  
34  
35  
36

## 37 **RESULTS**

38 Four hundred and ninety-nine titles were retrieved from searches of electronic databases.  
39 Duplicates (138) were removed and 361 titles/abstracts were reviewed. Eighteen papers were  
40 considered for review after initial screening of titles and abstracts. Three further studies were  
41 identified as potentially eligible from reference checking. After reviewing the full text articles, 6  
42 studies met the inclusion criteria; 2 RCTs and 4 cohort studies (PRISMA flow-chart-figure 1)[20].  
43 Studies were excluded because of study design e.g. chart review/audit; intervention e.g. contact  
44 with a multidisciplinary team instead of contact with a podiatrist; or in one case, the study was  
45 described in another article already included in this systematic review.  
46  
47  
48

49 Table 1 describes the included studies according to study design, participants, interventions and  
50 outcomes. Quality of included studies was assessed and all studies were deemed of suitable quality  
51 for inclusion (tables 2 & 3). Risk of foot disease at baseline was assessed using the Diabetic foot risk  
52 stratification and triage system from the SIGN (Scottish Intercollegiate Guidelines Network)  
53 guidelines (Appendix 1) [14]. Results of included studies are presented in table 4.  
54  
55

56 Results from available studies were pooled together in separate meta-analyses for RCTs and  
57 observational studies. Five of these studies provided sufficient data to allow meta-analysis. For  
58  
59  
60

1  
2  
3 RCTs, the fixed effects model was applied ( $Q=0.328$ ,  $p=0.567$ ) and for cohort studies, the random  
4 effects model is reported as there was evidence of significant heterogeneity between the cohort  
5 studies ( $Q = 32.698$ ,  $p=0.000$ ). Meta-analysis of the two RCTs yielded an insignificant pooled RR of  
6 1.4 (0.2-9.8) while meta-analysis of the cohort studies also yielded an insignificant pooled RR of 0.7  
7 (0.4-1.3) (figure 2).  
8  
9

10 Data required for inclusion in the meta-analysis was unavailable for 1 eligible study. Lavery et al  
11 compared people with diabetes on dialysis and people with diabetes with a history of a healed ulcer.  
12 During a 30-month evaluation period, only 30% of patients from both groups combined were seen  
13 for preventative care prior to ulceration. The amputation incidence density was high in both groups  
14 (dialysis group 58.7 and ulcer group 13.1 per 1,000 person-years) [21]. However, it was not possible  
15 to extract the LEA event rate in those who did or did not have contact with a podiatrist.  
16  
17

18 Visual inspection of the funnel plot produced for the included studies shows no strong evidence of  
19 publication bias (figure 3).  
20  
21

## 22 **DISCUSSION**

23  
24 In this systematic review, we conclude that there is insufficient evidence to determine whether  
25 contact with a podiatrist has an effect on LEA in people with diabetes.  
26  
27

### 28 **Strengths and limitations of this review**

29 This is the first systematic review that the authors are aware of that investigates if contact with a  
30 podiatrist prevents the occurrence of a lower extremity amputation in patients with diabetes. A  
31 thorough literature search examining multiple databases was undertaken and 6 studies with 2  
32 different study designs were included. While individual study design meta-analysis was performed  
33 in an effort to pool the available data, we acknowledge that heterogeneity exists between studies  
34 included in the meta-analysis in terms of baseline diabetic foot risk and type of intervention.  
35  
36

37 Included studies looked at different sample populations ranging from patients with low baseline risk  
38 to patients with active disease. For example, Ronnema et al recruited patients with diabetes from  
39 the national drug imbursement register in Finland which is representative of the total population  
40 with diabetes [22]. However, Plank et al recruited patients with diabetes from a tertiary referral  
41 centre which represents a population of patients with diabetes that have developed complications  
42 requiring referral to a tertiary centre [23]. In 5 of the 6 included studies, the population at risk were  
43 patients with diabetes. However, Sowell et al examined a population mix of patients with diabetes,  
44 PVD and gangrene [24]. It was decided to include this study due to the dearth of research in this  
45 area. This difference in populations studied between the Sowell paper and the other 5 studies needs  
46 to be highlighted as a limitation in this review.  
47  
48  
49

50 The diabetic foot risk of the participants at baseline (low-active) reflects the different treatment  
51 settings at recruitment and highlights heterogeneity amongst the studies (table 1). Cochran's  $Q$   
52 statistic was used to assess heterogeneity. For RCTs, the fixed effects model was appropriate but  
53 this meta-analysis is limited as there are only 2 included studies. For cohort studies, the  $Q$  statistic of  
54 32.698 ( $p=0.000$ ) indicated that strong heterogeneity existed so the random effects model was  
55 applied to account for both random variability and the variability in effects among the studies.  
56 However, use of the random effects model limits the conclusions that can be drawn from the meta-  
57  
58  
59  
60

1  
2  
3 analysis [25]. 'A priori' sensitivity analyses were planned for different levels of baseline risk but  
4 there were insufficient data.  
5

6 Sources of potential bias should be considered in relation to the observational studies. Although  
7 information was collected on potential confounders in many of the included observational studies,  
8 the analyses were not adjusted for potential confounders and sources of bias. Clinical practices may  
9 vary per individual and per location. Guidelines have been recently developed to standardise referral  
10 of patients with diabetes to podiatry [14]. Healthcare-seeking behaviours are complex and  
11 multifactorial and ethnicity and socio-economic position can influence attendance at podiatry [26]  
12 [27]. Level of disease may also influence a patient's decision to attend the podiatrist and create a  
13 self-selection bias in the patients with diabetes that attend the podiatrist. Patients that attend  
14 healthcare services in early stages of disease may be more likely to engage in other healthy lifestyle  
15 behaviours e.g. healthy diet, not smoking and this phenomenon of 'healthy user bias' has been  
16 previously documented [28]. In their retrospective cohort study, Sowell et al reported 20 LEAs in the  
17 intervention group and 130 in the control group (noting that the population at risk in this study is  
18 patients with diabetes and/or gangrene and/or PVD) [24]. This study described the majority of  
19 included participants with the outcome of LEA. However, their analysis did not adjust for important  
20 potential confounders which limit the conclusions that can be drawn from this study.  
21  
22  
23  
24

25  
26 The issues of bias and confounding are eliminated by randomisation in RCTs. However, there is a  
27 lack of RCTs in this area. The 2 available RCTs have a lack of power as few participants had the  
28 outcome of LEA. The most likely cause of the low numbers of outcomes in the included studies is  
29 length of follow-up. LEA takes years to develop, especially from the time-point when a patient is  
30 classified as low risk. In the 1<sup>st</sup> included RCT, Plank et al described 2 LEAs in the intervention group  
31 and 1 in the control group [23]. In the 2<sup>nd</sup> RCT, Ronnema et al noted no LEA after 1 year of follow-  
32 up and 1 LEA in the intervention group after 7 years of follow-up [22]. Neither RCT was designed to  
33 assess LEA as a primary outcome and thus, had insufficient power to detect a significant difference  
34 for the outcome of LEA.  
35  
36  
37

### 38 **Conclusions and Implications**

39 Two Cochrane reviews have looked at the outcome of LEA in patients with diabetes [16 17]. These  
40 reviews concluded that there is insufficient evidence that brief educational interventions or complex  
41 interventions reduce the risk of LEA. This systematic review concludes that there is insufficient  
42 evidence that contact with a podiatrist reduces the risk of LEA in patients with diabetes. Thus, this  
43 review cannot make any recommendations about practice. To detect the true effect, adequately  
44 powered RCTs and longer follow-up studies are needed to examine the effect of contact with a  
45 podiatrist on LEA in patients with diabetes. Perhaps, podiatry programmes could be rolled out in a  
46 manner designed to answer the question of effect on outcomes such as LEA. Such studies could also  
47 assess the impact of the timing and intensity of the podiatry intervention on outcomes. Perhaps  
48 studies focusing on high-risk participants are too close in timing to the LEA event and studies of  
49 lower-risk participants would be better to detect an effect in LEA prevention.  
50  
51  
52

53 International standards recommend a multidisciplinary team should manage the footcare of a  
54 patient with diabetes [14]. Many studies have looked at the effects of a multidisciplinary team of  
55 which podiatry serves as a member of the team and found positive effects on various outcomes [29-  
56 36]. This may be a more realistic reflection of how patients with diabetes are managed; looking at  
57  
58  
59  
60



1  
2  
3 one service in isolation could be flawed as services are seldom delivered in isolation. According to  
4 the SIGN (Scottish Intercollegiate Guidelines Network) guidelines a multidisciplinary foot team  
5 should include a podiatrist, diabetes physician, orthotist, diabetes nurse specialist, vascular surgeon,  
6 orthopaedic surgeon and radiologist [14]. A systematic review of the literature looking at the  
7 effectiveness of multidisciplinary teams which include contact with a podiatrist would be useful.  
8  
9

### 10 **Acknowledgements**

11 We would like to thank the authors who responded to our queries and Professor John Browne, UCC  
12 for advice on methodology.  
13

### 14 **Declaration of Competing Interests**

15 Nothing to declare.  
16  
17

### 18 **Funding**

19 This project is partially funded by the HRB (Health Research Board), Ireland – Grant Reference  
20 Number: HPF/2009/79 and partially funded by the ICGP (Irish College of General Practitioners)  
21 Research and Education Foundation.  
22  
23

### 24 **Contributor statement**

25 Claire M Buckley (CMB) conceived and designed the study, extracted the data and wrote the paper.  
26 Ivan J Perry (IJP) revised the paper. Colin P Bradley (CPB) approved the final version to be published.  
27 Patricia M Kearney (PMK) designed the study, extracted the data and wrote the paper. CMB will act  
28 as guarantor for the paper.  
29  
30

### 31 **Ethical Approval**

32 None required.  
33  
34

### 35 **Data Sharing Statement**

36 There is no additional data available.  
37  
38

### 39 **Abbreviations**

40 CINAHL, Cumulative Index to Nursing and Allied Health Literature, LEA, Lower Extremity Amputation,  
41 MeSH, Medical Subject Headings, NHS, National Health Service, PVD, Peripheral Vascular Disease,  
42 RCT, Randomised Controlled Trial, SIGN, Scottish Intercollegiate Guidelines Network, UCC,  
43 University College Cork, UK, United Kingdom  
44  
45  
46  
47

### 48 **REFERENCES**

- 49  
50 1. Lam DW, LeRoith D. The worldwide diabetes epidemic. *Current Opinion in Endocrinology,*  
51 *Diabetes and Obesity* 2012;19(2):93-96 10.1097/MED.0b013e328350583a  
52 2. Moxey P, Gogalniceanu P, Hincliffe R, et al. Lower extremity amputations—a review of global  
53 variability in incidence. *Diabetic Medicine* 2011;28(10):1144–53  
54 3. Turner R, Holman R, Stratton I, et al. Tight blood pressure control and risk of macrovascular and  
55 microvascular complications in type 2 diabetes: UKPDS 38. *BMJ* 1998;317(7160):703-13  
56 4. Intensive blood-glucose control with sulphonylureas or insulin compared with conventional  
57 treatment and risk of complications in patients with type 2 diabetes (UKPDS 33). UK  
58  
59  
60

- 1  
2  
3 Prospective Diabetes Study (UKPDS) Group. Lancet 1998;352(9131):837-53 doi:  
4 S0140673698070196 [pii][published Online First: Epub Date]].
- 5 5. Boulton AJ. Lowering the risk of neuropathy, foot ulcers and amputations. Diabet Med 1998;15  
6 Suppl 4:S57-9 doi: 10.1002/(sici)1096-9136(1998120)15:4+<s57::aid-dia741>3.0.co;2-  
7 d[published Online First: Epub Date]].
- 8 6. Apelqvist J, Larsson J. What is the most effective way to reduce incidence of amputation in the  
9 diabetic foot? Diabetes/metabolism research and reviews 2000;16(S1):S75-S83
- 10 7. Singh N, Armstrong DG, Lipsky BA. Preventing foot ulcers in patients with diabetes. JAMA  
11 2005;293(2):217-28 doi: 10.1001/jama.293.2.217[published Online First: Epub Date]].
- 12 8. IDF. Position Statement - the Diabetic Foot. Secondary Position Statement - the Diabetic Foot.  
13 <http://www.idf.org/position-statement-diabetic-foot>.
- 14 9. Adler A, Erqou S, Lima TAS, Robinson AHN. Association between glycated haemoglobin and the  
15 risk of lower extremity amputation in patients with diabetes mellitus—review and meta-  
16 analysis. Diabetologia 2010;53(5):840-49
- 17 10. Adler AI, Boyko EJ, Ahroni JH, Smith DG. Lower-extremity amputation in diabetes. The  
18 independent effects of peripheral vascular disease, sensory neuropathy, and foot ulcers.  
19 Diabetes Care 1999;22(7):1029
- 20 11. Pecoraro R, Reiber G, Burgess E. Pathways to diabetic limb amputation. Basis for prevention.  
21 Diabetes Care 1990;13(5):513
- 22 12. Agardh E, Allebeck P, Hallqvist J, Moradi T, Sidorchuk A. Type 2 diabetes incidence and socio-  
23 economic position: a systematic review and meta-analysis. International Journal of  
24 Epidemiology 2011 doi: 10.1093/ije/dyr029[published Online First: Epub Date]].
- 25 13. Boulton AJM, Armstrong DG, Albert SF, et al. Comprehensive Foot Examination and Risk  
26 Assessment. Diabetes Care 2008;31(8):1679-85 doi: 10.2337/dc08-9021[published Online  
27 First: Epub Date]].
- 28 14. SIGN. Management of diabetes. A national clinical guideline March 2010.  
29 <http://www.sign.ac.uk/pdf/sign116.pdf>.
- 30 15. NHS. Careers in Detail. Secondary Careers in Detail.  
31 <http://www.nhs.uk/nhs-careers/nhs-careers-in-detail/Default.aspx?Id=280>.
- 32 16. Dorresteijn Johannes AN, Kriegsman Didi MW, Valk Gerlof D. Complex interventions for  
33 preventing diabetic foot ulceration. Cochrane Database of Systematic Reviews 2010; (1).  
34 <http://www.mrw.interscience.wiley.com/cochrane/clsysrev/articles/CD007610/frame.html>.
- 35 17. Dorresteijn Johannes AN KDM, Assendelft Willem JJ, Valk Gerlof D. Patient education for  
36 preventing diabetic foot ulceration. Cochrane Database of Systematic Reviews Updated;  
37 John Wiley & Sons, Ltd.  
38 <http://onlinelibrary.wiley.com/doi/10.1002/14651858.CD001488.pub4/abstract> (accessed  
39 2012).
- 40 18. Downs SH, Black N. The feasibility of creating a checklist for the assessment of the  
41 methodological quality both of randomised and non-randomised studies of health care  
42 interventions. Journal of Epidemiology and Community Health 1998;52(6):377-84 doi:  
43 10.1136/jech.52.6.377[published Online First: Epub Date]].
- 44 19. Higgins JPT, Thompson SG, Deeks JJ, Altman DG. Measuring inconsistency in meta-analyses. BMJ  
45 2003;327(7414):557-60 doi: 10.1136/bmj.327.7414.557[published Online First: Epub Date]].
- 46 20. Liberati A, Altman DG, Tetzlaff J, et al. The PRISMA statement for reporting systematic reviews  
47 and meta-analyses of studies that evaluate healthcare interventions: explanation and  
48 elaboration. BMJ 2009;339 doi: 10.1136/bmj.b2700[published Online First: Epub Date]].
- 49 21. Lavery LA, Hunt NA, LaFontaine J, Baxter CL, Ndiip A, Boulton AJM. Diabetic Foot Prevention.  
50 Diabetes Care 2010;33(7):1460-62 doi: 10.2337/dc10-0310[published Online First: Epub  
51 Date]].
- 52  
53  
54  
55  
56  
57  
58  
59  
60

- 1
- 2
- 3 22. Ronnema T, Hamalainen H, Toikka T, Liukkonen I. Evaluation of the impact of podiatrist care in
- 4 the primary prevention of foot problems in diabetic subjects. *Diabetes Care*
- 5 1997;20(12):1833-7
- 6
- 7 23. Plank J, Haas W, Rakovac I, et al. Evaluation of the Impact of Chiropracist Care in the Secondary
- 8 Prevention of Foot Ulcerations in Diabetic Subjects. *Diabetes Care* 2003;26(6):1691-95 doi:
- 9 10.2337/diacare.26.6.1691[published Online First: Epub Date]].
- 10
- 11 24. Sowell RD, Mangel WB, Kilczewski CJ, Normington JM. Effect of podiatric medical care on rates of
- 12 lower-extremity amputation in a Medicare population. *J Am Podiatr Med Assoc*
- 13 1999;89(6):312-7
- 14
- 15 25. Pereira TV, Patsopoulos NA, Salanti G, Ioannidis JPA. Critical interpretation of Cochran's Q test
- 16 depends on power and prior assumptions about heterogeneity. *Research Synthesis Methods*
- 17 2010;1(2):149-61 doi: 10.1002/jrsm.13[published Online First: Epub Date]].
- 18
- 19 26. Fylkesnes K. Determinants of Health Care Utilization — Visits and Referrals. *Scandinavian Journal*
- 20 *of Public Health* 1993;21(1):40-50 doi: 10.1177/140349489302100107[published Online
- 21 First: Epub Date]].
- 22
- 23 27. Adamson J, Ben-Shlomo Y, Chaturvedi N, Donovan J. Ethnicity, socio-economic position and
- 24 gender—do they affect reported health—care seeking behaviour? *Social Science &*
- 25 *Medicine* 2003;57(5):895-904 doi: 10.1016/s0277-9536(02)00458-6[published Online First:
- 26 Epub Date]].
- 27
- 28 28. Jackson LA, Jackson ML, Nelson JC, Neuzil KM, Weiss NS. Evidence of bias in estimates of
- 29 influenza vaccine effectiveness in seniors. *International Journal of Epidemiology*
- 30 2006;35(2):337-44 doi: 10.1093/ije/dyi274[published Online First: Epub Date]].
- 31
- 32 29. Leese GP, Schofield CJ. Amputations in diabetes: A changing scene. *Practical Diabetes*
- 33 *International* 2008;25(8):297-99
- 34
- 35 30. El Sakka K, Fassiadis N, Gambhir RP, et al. An integrated care pathway to save the critically
- 36 ischaemic diabetic foot. *Int J Clin Pract* 2006;60(6):667-9 doi: 10.1111/j.1368-
- 37 5031.2006.00953.x[published Online First: Epub Date]].
- 38
- 39 31. Dargis V, Pantelejeva O, Jonushaite A, Vileikyte L, Boulton AJ. Benefits of a multidisciplinary
- 40 approach in the management of recurrent diabetic foot ulceration in Lithuania: a
- 41 prospective study. *Diabetes Care* 1999;22(9):1428-31
- 42
- 43 32. Van Gils CC, Wheeler LA, Mellstrom M, Brinton EA, Mason S, Wheeler CG. Amputation
- 44 prevention by vascular surgery and podiatry collaboration in high-risk diabetic and
- 45 nondiabetic patients. The Operation Desert Foot experience. *Diabetes Care* 1999;22(5):678-
- 46 83
- 47
- 48 33. Meltzer DD, Pels S, Payne WG, et al. Decreasing amputation rates in patients with diabetes
- 49 mellitus. An outcome study. *Journal of the American Podiatric Medical Association*
- 50 2002;92(8):425-28
- 51
- 52 34. Larsson J, Apelqvist J, Agardh CD, Stenstrom A. Decreasing incidence of major amputation in
- 53 diabetic patients: a consequence of a multidisciplinary foot care team approach? *Diabet*
- 54 *Med* 1995;12(9):770-6
- 55
- 56 35. Frykberg RG. Team approach toward lower extremity amputation prevention in diabetes. *J Am*
- 57 *Podiatr Med Assoc* 1997;87(7):305-12
- 58
- 59 36. Patout CA, Birke JA, Horswell R, Williams D, Cerise FP. Effectiveness of a comprehensive diabetes
- 60 lower-extremity amputation prevention program in a predominantly low-income African-
- American population. *Diabetes Care* 2000;23(9):1339-42 doi:
- 10.2337/diacare.23.9.1339[published Online First: Epub Date]].
37. Lipscombe J, Jassal SV, Bailey S, Bargman JM, Vas S, Oreopoulos DG. Chiropody may prevent
- amputations in diabetic patients on peritoneal dialysis. *Perit Dial Int* 2003;23(3):255-9
38. Sloan FA, Feinglos MN, Grossman DS. Receipt of Care and Reduction of Lower Extremity
- Amputations in a Nationally Representative Sample of U.S. Elderly. *Health Services Research*

2010;45(6p1):1740-62 doi: 10.1111/j.1475-6773.2010.01157.x[published Online First: Epub Date]].

### Table legends

Table 1 Characteristics of Included Studies

Table 2 Quality Assessment of Included RCTs

Table 3 Quality Assessment of Included Cohort Studies

Table 4 Results of Included Studies

### Appendices legends

Appendix 1 Diabetic foot risk stratification and triage

Appendix 2 Search Strategy for PUBMED (1966 – Sept 25<sup>th</sup> 2011)

Appendix 3 Search Strategy for CINAHL (1981 – Sept 25<sup>th</sup> 2011)

Appendix 4 Search Strategy for EMBASE (1974 – Sept 25<sup>th</sup> 2011)

Appendix 5 Search Strategy for Cochrane (1993 – Sept 25<sup>th</sup> 2011)

Appendix 6 Table of Excluded Studies

## TABLES

Table 1 Characteristics of Included Studies

| Study (Author, Country, Year) | Type of study | Participants                                                               | Interventions                                                                                                                 | Source of data used in study | Length of follow-up                                               | Baseline risk as per diabetic foot risk stratification [14] | Outcomes                                                                                    |
|-------------------------------|---------------|----------------------------------------------------------------------------|-------------------------------------------------------------------------------------------------------------------------------|------------------------------|-------------------------------------------------------------------|-------------------------------------------------------------|---------------------------------------------------------------------------------------------|
| Ronnemaa, Finland, 1997[22]   | RCT           | 530 patients with diabetes randomised<br>Intervention: 267<br>Control: 263 | Intervention: 45 minutes individual patient education<br>Podiatric care visits as necessary<br>Control: Written information   | Clinical report forms        | 1 year and 7 years                                                | Low                                                         | Primary: Patient Knowledge about foot care<br>Secondary: Ulcer incidence<br>Amputation rate |
| Plank, Austria, 2003[23]      | RCT           | 91 patients with diabetes randomised<br>Intervention: 47<br>Control: 44    | Intervention: Chiropodist visit at least once a month<br>Control: chiropodist treatment not specifically recommended          | Clinical report forms        | 386 days (368-424, 25 <sup>th</sup> -75 <sup>th</sup> percentile) | High (healed foot ulcers)                                   | Primary: recurrence rate of ulcers<br>Secondary: Amputation rate<br>Death                   |
| Sowell, USA, 1999[24]         | Cohort        | 255,256 with diabetes or PVD or gangrene followed over time                | Intervention: Podiatric Medical care – receipt of any M0101 services<br>Comparison: Did not receive podiatry (M0101) services | Medicare claims database     | 1 year                                                            | Unknown                                                     | Number of Amputations                                                                       |
| Lipscombe, Canada, 2003 [37]  | Cohort        | 132 patients with diabetes on PD (Peritoneal Dialysis)                     | Intervention: Assessment, education and footcare by chiropody                                                                 | Medical charts               | 3 years                                                           | High                                                        | Amputation                                                                                  |

1  
2  
3  
4  
5  
6  
7  
8  
9  
10  
11  
12  
13  
14  
15  
16  
17  
18  
19  
20  
21  
22  
23  
24  
25  
26  
27  
28  
29  
30  
31  
32  
33  
34  
35  
36  
37  
38  
39  
40  
41  
42  
43  
44  
45  
46  
47  
48  
49

|                       |        |                                                                                                                                                            |                                                                                                                                                                |                                          |           |                                                                          |                                    |
|-----------------------|--------|------------------------------------------------------------------------------------------------------------------------------------------------------------|----------------------------------------------------------------------------------------------------------------------------------------------------------------|------------------------------------------|-----------|--------------------------------------------------------------------------|------------------------------------|
| Lavery, USA, 2010[21] | Cohort | 300 high-risk patients with diabetes<br>150 with an ulcer history<br>150 on dialysis followed over time                                                    | Intervention: Podiatry services - number of visits to podiatrist for prevention, ulcer treatment of other pathology                                            | Claims data & Electronic Medical Records | 30 months | High (history of foot ulcer)                                             | Amputation rate<br>Ulcer incidence |
| Sloan, UK, 2010[38]   | Cohort | 189,598 patients with diabetes followed over time<br>Participants grouped into different stages (1-4) of disease depending on severity of symptoms & signs | Intervention: Care provided by podiatrist<br>Comparison: Care provided by 'other health professional' – GP/Internist/Endocrinologist/Nurse/Physician Assistant | Medicare claims database                 | 6 years   | Stage 1: Moderate<br>Stage 2: High<br>Stage 3: Active<br>Stage 4: Active | Amputation rate                    |

review only

Table 2 Quality Assessment of Included RCTs

| Study (Author, Country, Year) | Type of study | Base Population                                                                                                       | Randomisation                                                                                                          | Blinding                                                                                             | Confounding                            | Losses to follow-up                                                                                           | Analysis                                   |
|-------------------------------|---------------|-----------------------------------------------------------------------------------------------------------------------|------------------------------------------------------------------------------------------------------------------------|------------------------------------------------------------------------------------------------------|----------------------------------------|---------------------------------------------------------------------------------------------------------------|--------------------------------------------|
| Ronnemaa, Finland, 1997[22]   | RCT           | Community based care in Finland, receiving anti-diabetic drug treatment from the national drug reimbursement register | Randomisation performed separately for men/women and patients </> 20 years. Method of randomisation not described      | Outcome assessor blinded to baseline characteristics but no further information on blinding provided | Baseline Characteristics not described | Follow-up completed by 63% of patients in intervention group and 62% patients in control group at seven years | No intention to treat analysis undertaken  |
| Plank, Austria, 2003[23]      | RCT           | All in routine outpatient care at hospital diabetic foot clinic in Austria                                            | Subjects were assigned a patient number in ascending order and randomly allocated to the intervention or control group | Allocation concealment ensured                                                                       | Similar Baseline Characteristics       | All patients followed up                                                                                      | Intention to treat & per protocol analysis |

1  
2  
3  
4  
5  
6  
7  
8  
9  
10  
11  
12  
13  
14  
15  
16  
17  
18  
19  
20  
21  
22  
23  
24  
25  
26  
27  
28  
29  
30  
31  
32  
33  
34  
35  
36  
37  
38  
39  
40  
41  
42  
43  
44  
45  
46  
47  
48  
49

Table 3 Quality Assessment of Included Cohort Studies

| Study (Author, Country, Year) | Type of study | Base Population                                                                                              | Confounding                                                              | Losses to follow-up                                                                                                       | Analysis                                                                                                |
|-------------------------------|---------------|--------------------------------------------------------------------------------------------------------------|--------------------------------------------------------------------------|---------------------------------------------------------------------------------------------------------------------------|---------------------------------------------------------------------------------------------------------|
| Sowell, USA, 1999[24]         | Cohort        | All Medicare population at risk for lower extremity amputation in 1993-1994                                  | Not addressed – only looked at 1 variable – acknowledged as a limitation | No losses to follow-up                                                                                                    | Amputation incidence rates with & without exposure to podiatry                                          |
| Lipscombe, Canada, 2003 [37]  | Cohort        | Patients in Peritoneal Dialysis program at University Health Network, between January 1997 and December 1999 | Data on confounding variables collected                                  | No losses to follow-up                                                                                                    | Descriptive Stats                                                                                       |
| Lavery, USA, 2010[21]         | Cohort        | Patients with diabetes attending Scott and White Health Plan, Texas, USA                                     | Data on confounding variables collected                                  | 150 consecutive patients with at least 30 months follow-up from the time of diagnosis recruited so no losses to follow-up | Descriptive Stats                                                                                       |
| Sloan, UK, 2010[38]           | Cohort        | All individuals with a DM-related LEC diagnosis between 1994 and 2001                                        | Data on confounding variables collected                                  | No losses to follow-up                                                                                                    | Hazard Ratios adjusted for Medicare expenditures from care received from non-study health professionals |



Table 4 Results of Included Studies

| Study (Author, Country, Year) | Type of study | Primary Outcome                                                                                                                                                                                                         | Baseline risk as per diabetic foot risk stratification [14]              | Relative risk of amputation with contact with a podiatrist compared to no contact with a podiatrist |
|-------------------------------|---------------|-------------------------------------------------------------------------------------------------------------------------------------------------------------------------------------------------------------------------|--------------------------------------------------------------------------|-----------------------------------------------------------------------------------------------------|
| Ronnemaa, Finland, 1997 [22]  | RCT           | <u>Diabetes-related Amputation:</u><br>One year follow-up: Intervention: 0 Control: 0<br>Seven years follow-up: Intervention: 1 Control: 0                                                                              | Low                                                                      | 2.96                                                                                                |
| Plank, Austria, 2003[23]      | RCT           | <u>Diabetes-related Amputation:</u><br>One year follow-up: Intervention: 2 Control: 1                                                                                                                                   | High (healed foot ulcers)                                                | 0.9                                                                                                 |
| Sowell, USA, 1999[24]         | Cohort        | <u>Amputation related to diabetes/gangrene/PVD</u><br>One year follow-up: Intervention: 20<br>Control: 130                                                                                                              | Unknown                                                                  | 0.25                                                                                                |
| Lipscombe, Canada, 2003 [37]  | Cohort        | <u>Diabetes-related Amputation:</u><br>Amputation during any of the 3 years of the study: Intervention: 11 Control: 4                                                                                                   | High                                                                     | 2.1                                                                                                 |
| Lavery, USA, 2010[21]         | Cohort        | <u>Diabetes-related Amputation:</u><br>Actual number of amputations not outlined<br><u>Amputation Incidence Density:</u><br>58.7 in Dialysis Group per 1,000 person years<br>13.1 in Ulcer Group per 1,000 person years | High (history of foot ulcer)                                             | Unknown                                                                                             |
| Sloan, UK, 2010[38]           | Cohort        | <u>Diabetes-related Amputation:</u><br>Six year follow-up: actual number of amputations not outlined                                                                                                                    | Stage 1: Moderate<br>Stage 2: High<br>Stage 3: Active<br>Stage 4: Active | Stage 1 disease : 2.2<br>Stage 2 disease : 0.85<br>Stage 3 disease : 0.44<br>Stage 4 disease : 0.36 |

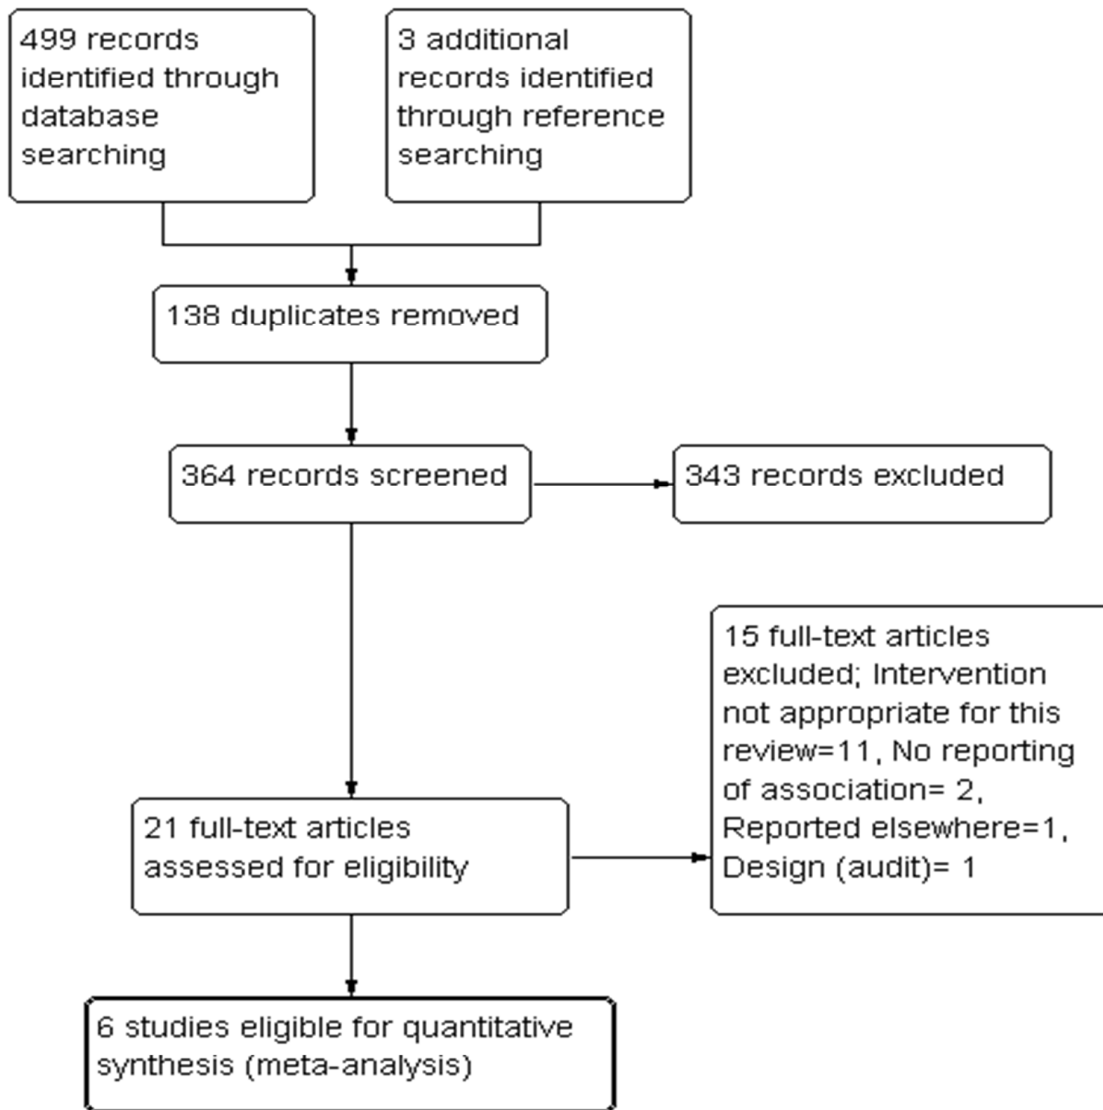

Figure 1 Selection of studies for inclusion in review

Only

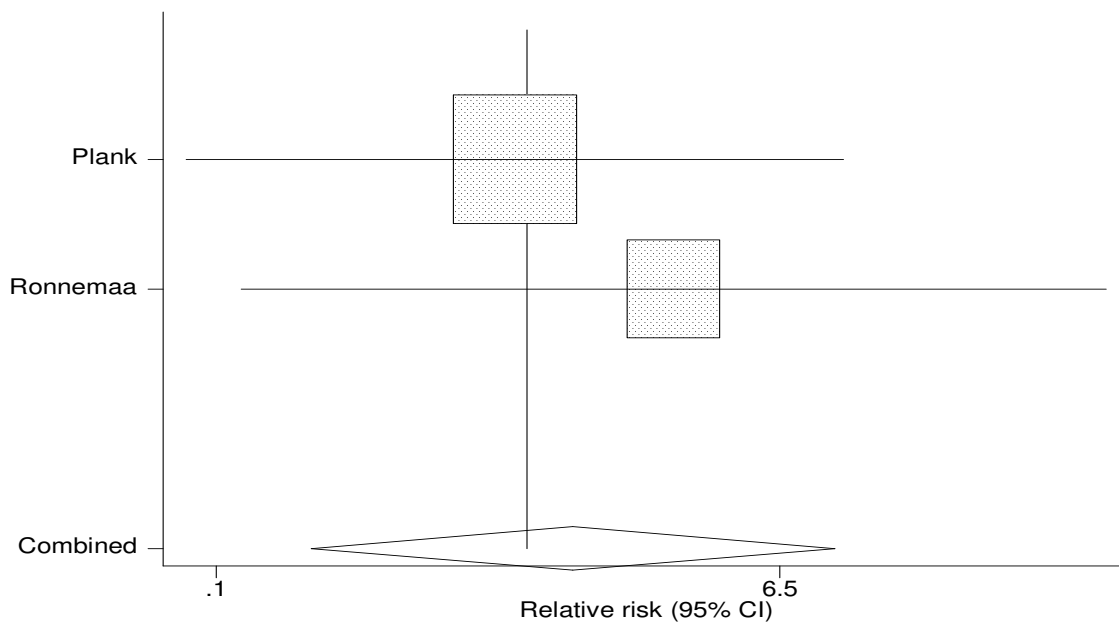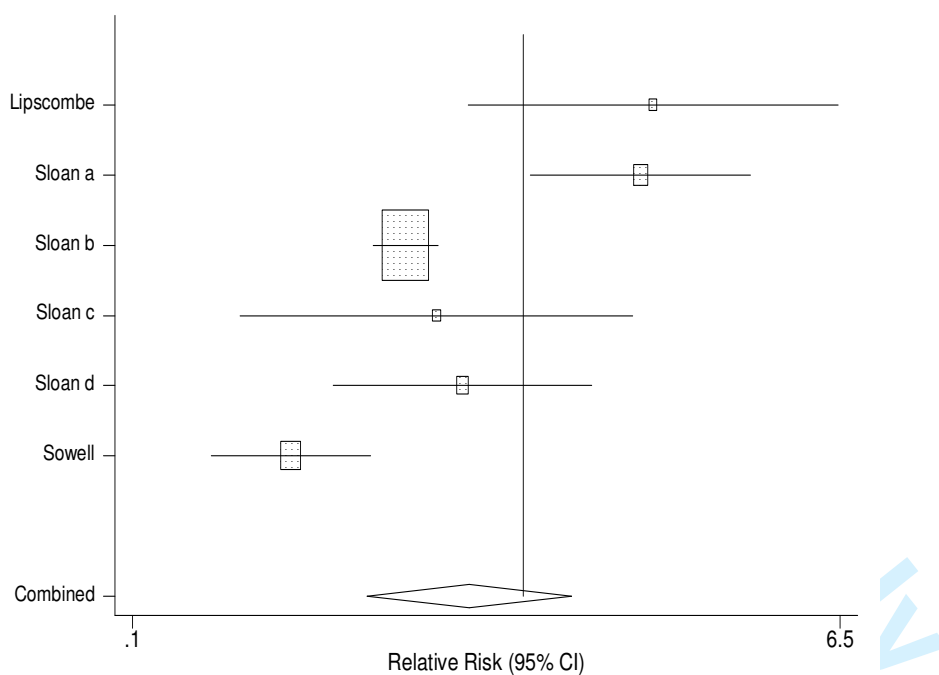

Figure 2 Forest plots of meta- analysis of RCTs (top) and Cohort studies (bottom) with the intervention of contact with a podiatrist on left side of plot

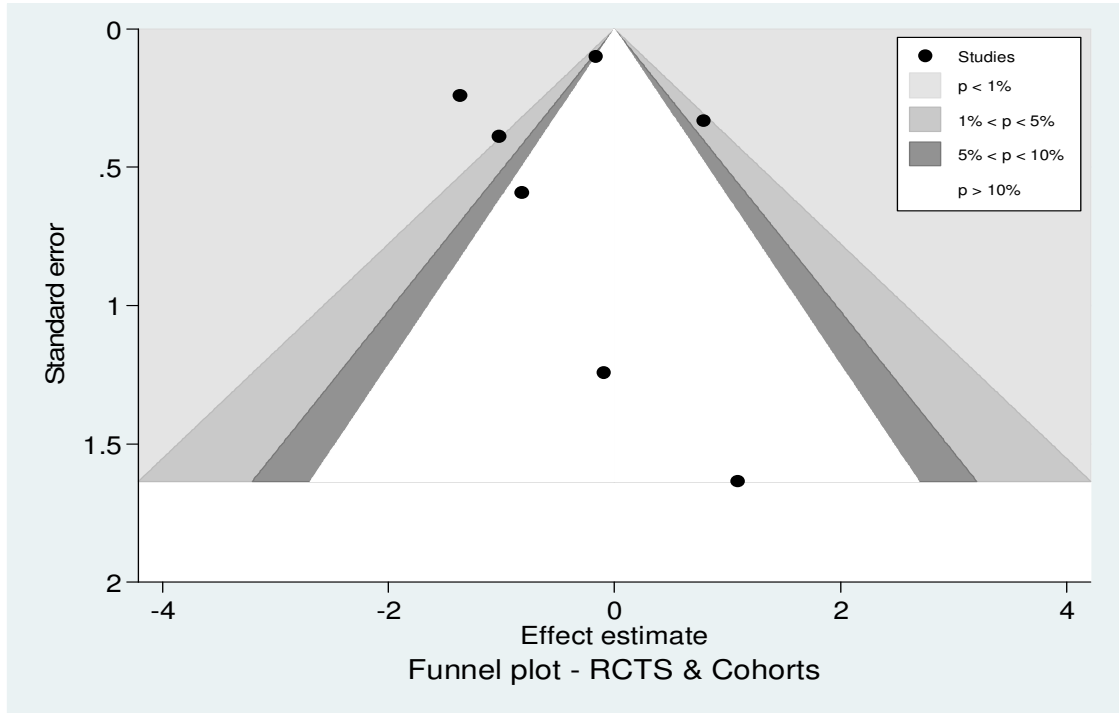

Figure 3 Funnel plot of included studies (RCTs and Cohort studies)

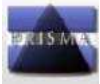

# PRISMA 2009 Checklist

1  
2  
3  
4  
5  
6  
7  
8  
9  
10  
11  
12  
13  
14  
15  
16  
17  
18  
19  
20  
21  
22  
23  
24  
25  
26  
27  
28  
29  
30  
31  
32  
33  
34  
35  
36  
37  
38  
39  
40  
41  
42  
43  
44  
45  
46  
47  
48  
49

| Section/topic                      | #  | Checklist item                                                                                                                                                                                                                                                                                              | Reported on page # |
|------------------------------------|----|-------------------------------------------------------------------------------------------------------------------------------------------------------------------------------------------------------------------------------------------------------------------------------------------------------------|--------------------|
| <b>TITLE</b>                       |    |                                                                                                                                                                                                                                                                                                             |                    |
| Title                              | 1  | Identify the report as a systematic review, meta-analysis, or both.                                                                                                                                                                                                                                         | 1                  |
| <b>ABSTRACT</b>                    |    |                                                                                                                                                                                                                                                                                                             |                    |
| Structured summary                 | 2  | Provide a structured summary including, as applicable: background; objectives; data sources; study eligibility criteria, participants, and interventions; study appraisal and synthesis methods; results; limitations; conclusions and implications of key findings; systematic review registration number. | 2-3                |
| <b>INTRODUCTION</b>                |    |                                                                                                                                                                                                                                                                                                             |                    |
| Rationale                          | 3  | Describe the rationale for the review in the context of what is already known.                                                                                                                                                                                                                              | 4                  |
| Objectives                         | 4  | Provide an explicit statement of questions being addressed with reference to participants, interventions, comparisons, outcomes, and study design (PICOS).                                                                                                                                                  | 4                  |
| <b>METHODS</b>                     |    |                                                                                                                                                                                                                                                                                                             |                    |
| Protocol and registration          | 5  | Indicate if a review protocol exists, if and where it can be accessed (e.g., Web address), and, if available, provide registration information including registration number.                                                                                                                               | 4                  |
| Eligibility criteria               | 6  | Specify study characteristics (e.g., PICOS, length of follow-up) and report characteristics (e.g., years considered, language, publication status) used as criteria for eligibility, giving rationale.                                                                                                      | 4-5                |
| Information sources                | 7  | Describe all information sources (e.g., databases with dates of coverage, contact with study authors to identify additional studies) in the search and date last searched.                                                                                                                                  | 4                  |
| Search                             | 8  | Present full electronic search strategy for at least one database, including any limits used, such that it could be repeated.                                                                                                                                                                               | 19-22              |
| Study selection                    | 9  | State the process for selecting studies (i.e., screening, eligibility, included in systematic review, and, if applicable, included in the meta-analysis).                                                                                                                                                   | 5                  |
| Data collection process            | 10 | Describe method of data extraction from reports (e.g., piloted forms, independently, in duplicate) and any processes for obtaining and confirming data from investigators.                                                                                                                                  | 5                  |
| Data items                         | 11 | List and define all variables for which data were sought (e.g., PICOS, funding sources) and any assumptions and simplifications made.                                                                                                                                                                       | 5                  |
| Risk of bias in individual studies | 12 | Describe methods used for assessing risk of bias of individual studies (including specification of whether this was done at the study or outcome level), and how this information is to be used in any data synthesis.                                                                                      | 5                  |
| Summary measures                   | 13 | State the principal summary measures (e.g., risk ratio, difference in means).                                                                                                                                                                                                                               | 5                  |
| Synthesis of results               | 14 | Describe the methods of handling data and combining results of studies, if done, including measures of consistency (e.g., $I^2$ ) for each meta-analysis.                                                                                                                                                   | 5                  |

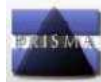

# PRISMA 2009 Checklist

1  
2  
3  
4  
5  
6  
7  
8  
9  
10  
11  
12  
13  
14  
15  
16  
17  
18  
19  
20  
21  
22  
23  
24  
25  
26  
27  
28  
29  
30  
31  
32  
33  
34  
35  
36  
37  
38  
39  
40  
41  
42  
43  
44  
45  
46  
47  
48  
49

| Section/topic                 | #  | Checklist item                                                                                                                                                                                           | Reported on page # |
|-------------------------------|----|----------------------------------------------------------------------------------------------------------------------------------------------------------------------------------------------------------|--------------------|
| Risk of bias across studies   | 15 | Specify any assessment of risk of bias that may affect the cumulative evidence (e.g., publication bias, selective reporting within studies).                                                             | 5                  |
| Additional analyses           | 16 | Describe methods of additional analyses (e.g., sensitivity or subgroup analyses, meta-regression), if done, indicating which were pre-specified.                                                         | 7                  |
| <b>RESULTS</b>                |    |                                                                                                                                                                                                          |                    |
| Study selection               | 17 | Give numbers of studies screened, assessed for eligibility, and included in the review, with reasons for exclusions at each stage, ideally with a flow diagram.                                          | 5<br>Figure 1      |
| Study characteristics         | 18 | For each study, present characteristics for which data were extracted (e.g., study size, PICOS, follow-up period) and provide the citations.                                                             | 13-14              |
| Risk of bias within studies   | 19 | Present data on risk of bias of each study and, if available, any outcome level assessment (see item 12).                                                                                                | 15-16              |
| Results of individual studies | 20 | For all outcomes considered (benefits or harms), present, for each study: (a) simple summary data for each intervention group (b) effect estimates and confidence intervals, ideally with a forest plot. | 17<br>Figure 2     |
| Synthesis of results          | 21 | Present results of each meta-analysis done, including confidence intervals and measures of consistency.                                                                                                  | 6                  |
| Risk of bias across studies   | 22 | Present results of any assessment of risk of bias across studies (see Item 15).                                                                                                                          | 6<br>Figure 3      |
| Additional analysis           | 23 | Give results of additional analyses, if done (e.g., sensitivity or subgroup analyses, meta-regression [see Item 16]).                                                                                    | 7                  |
| <b>DISCUSSION</b>             |    |                                                                                                                                                                                                          |                    |
| Summary of evidence           | 24 | Summarize the main findings including the strength of evidence for each main outcome; consider their relevance to key groups (e.g., healthcare providers, users, and policy makers).                     | 6                  |
| Limitations                   | 25 | Discuss limitations at study and outcome level (e.g., risk of bias), and at review-level (e.g., incomplete retrieval of identified research, reporting bias).                                            | 6                  |
| Conclusions                   | 26 | Provide a general interpretation of the results in the context of other evidence, and implications for future research.                                                                                  | 7-8                |
| <b>FUNDING</b>                |    |                                                                                                                                                                                                          |                    |
| Funding                       | 27 | Describe sources of funding for the systematic review and other support (e.g., supply of data); role of funders for the systematic review.                                                               | 8                  |

From: Moher D, Liberati A, Tetzlaff J, Altman DG, The PRISMA Group (2009). Preferred Reporting Items for Systematic Reviews and Meta-Analyses: The PRISMA Statement. PLoS Med 6(6): e1000097. doi:10.1371/journal.pmed1000097

For more information, visit: [www.prisma-statement.org](http://www.prisma-statement.org).

For peer review only - <http://bmjopen.bmj.com/site/about/guidelines.xhtml>

# PROTOCOL FOR SYSTEMATIC REVIEW

---

---

## DOES CONTACT WITH A PODIATRIST PREVENT THE OCCURRENCE OF A LOWER EXTREMITY AMPUTATION IN PEOPLE WITH DIABETES? A SYSTEMATIC REVIEW AND META-ANALYSIS

---

### **Authors:**

Dr Claire M. Buckley

Professor Ivan J. Perry

Professor Colin P. Bradley

Dr Patricia M. Kearney

## BACKGROUND

Diabetes is associated with a significant risk of LEA (lower extremity amputation) [1]. LEA rates vary between communities, 46-9,600 per 10<sup>5</sup> people with diabetes, for many reasons [2]. A number of factors influence the occurrence of a LEA in patients with diabetes; including hypertension, obesity and hyperglycaemia [3-7]. In the foot, previous ulceration, infection and ischaemia are proven risk factors [8]. Nearly 85% of amputations begin as foot ulcers among persons with diabetes [9]. Protective factors include control of clinical parameters and screening to identify those patients at high risk [10]. Many LEAs are preventable [11]. Thus, the effects of clinical and socio-demographic risk factors on the occurrence of a lower extremity amputation have been well documented in patients with diabetes in previous studies [12] [13] [14]. However, the effect of patient contact with a podiatrist on the occurrence of LEA in patients with diabetes is less well explored.

In 1998, the ADA (American Diabetes Association) published a technical review and position statement on preventive foot care in people with diabetes, highlighting the importance of foot care in people with diabetes to prevent adverse outcomes [15 16]. An updated position statement by the ADA in 2003 stated that early recognition and management of independent risk factors for ulcers and amputations can prevent or delay the onset of adverse outcomes [17]. However, these statements did not specify the role of podiatry. In 2005, the Standards of Medical Care of Diabetes issued by the ADA advised that problems involving the feet, especially ulcers and wound care, may require care by a podiatrist [18]. And in 2008, a task force report by the Foot Care Interest Group of the ADA stated that all patients with diabetes should be assigned to a foot risk category. These categories were designed to direct referral and subsequent therapy by the speciality clinician or team [19]. This report did not outline the role of podiatry but panel members included podiatric medicine representatives, suggesting that podiatry does have a place in footcare of patients with diabetes. It is now being recognised across the globe that podiatry has a role in the management of the diabetic foot. Guidelines from Scotland, Europe outline a diabetic risk stratification and triage tool, highlighting which patients need podiatry referral [20] (Appendix 1).

The management of diabetes is a complex process involving many healthcare professionals, including podiatrists. Two previous Cochrane reviews by Dorrestiejn et al have looked at lower extremity amputation in patients with diabetes as an outcome [21 22]. In 2009, Dorrestiejn et al concluded that there is no high quality evidence evaluating complex interventions (complex intervention defined as an integrated care approach) and insufficient evidence of benefit in preventing diabetic foot ulceration [21]. The second Cochrane review in 2010 concluded that there is insufficient robust evidence that limited patient education alone is effective in achieving clinically relevant reductions in ulcer and amputation incidence [22]. Individual patient contact with a podiatrist was not examined as an intervention in either review. To the best of our knowledge, the effect of contact with a podiatrist on the occurrence of a LEA in patients with diabetes has not been previously examined in any systematic review.

This review will look at contact with a podiatrist as an intervention to prevent LEA in patients with diabetes. Randomised and non-randomised studies will be included.

## Objectives

To conduct a systematic review of international literature to determine if contact with a podiatrist has an effect on the occurrence of LEA in patients with diabetes.



## METHODS

### Criteria for considering studies for review

#### Types of study design

Randomised and non-randomised studies that allow analysis of the effect of patient contact with a podiatrist in preventing LEAs will be included.

#### Types of participants

People with type 1 or type 2 diabetes mellitus in any health care setting.

#### Types of interventions

Studies of patients with diabetes attending a podiatrist for treatment alone or for treatment and education to prevent the occurrence of LEA will be included. Comparison groups will be those that were not in contact with podiatrists or received written instructions only.

#### Types of outcome measures

Primary: LEA (first or repeat)

Secondary: N/A

**Table 1 Inclusion & Exclusion Criteria**

| Inclusion Criteria:                                                                                               | Exclusion Criteria:                                                          |
|-------------------------------------------------------------------------------------------------------------------|------------------------------------------------------------------------------|
| <ul style="list-style-type: none"> <li>Any time</li> </ul>                                                        | <ul style="list-style-type: none"> <li>Cross-sectional studies</li> </ul>    |
| <ul style="list-style-type: none"> <li>English language</li> </ul>                                                | <ul style="list-style-type: none"> <li>Review articles</li> </ul>            |
| <ul style="list-style-type: none"> <li>Any Country</li> </ul>                                                     | <ul style="list-style-type: none"> <li>Non-systematic reviews</li> </ul>     |
| <ul style="list-style-type: none"> <li>Any age</li> </ul>                                                         | <ul style="list-style-type: none"> <li>Chart reviews /Case series</li> </ul> |
| <ul style="list-style-type: none"> <li>Patients with a diagnosis of diabetes – either type 1 or type 2</li> </ul> |                                                                              |

### Search strategy for identification of studies

Published studies will be identified through searches of PUBMED, CINAHL, EMBASE (Excerpta Medica), and Cochrane databases. No time-limits will be implemented. Where a study is reported in more than one article, data will be extracted from the most relevant report. The key search terms will be 'podiatry', 'amputation' and 'diabetes'. (Figure 1)

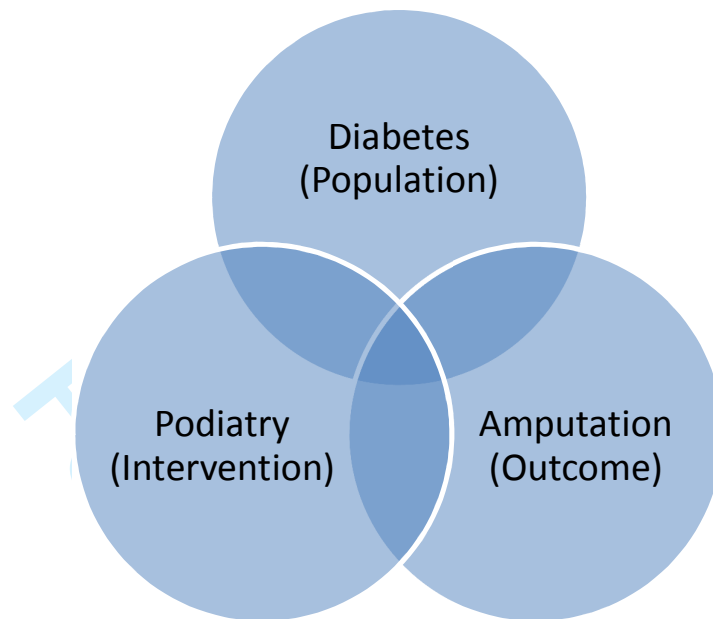

Figure 1 Venn diagram of key terms for search strategy

A comprehensive search strategy will be devised with the advice of the librarian. Key terms will be searched as MeSH (Medical Subject Heading) terms e.g. 'diabetes - MeSH term' and as free text with/without truncation as appropriate e.g. 'Diabet\*' (this symbol is used for identifying all words starting with Diabet, e.g. diabetes, diabetic etc.). The search will include case-control studies, cohort studies, retrospective and prospective studies, articles, clinical trials and RCTs. The strategy will be adapted as per database requirements.

In addition, hand searches will be conducted of the reference lists of all articles retrieved to identify other potentially eligible articles.

## Methods - data collection and analysis

### Selection of studies

Full copies of potentially eligible studies will be obtained and two review authors (CMB and PK) will decide independently on inclusion or exclusion (table 1). In the case of disagreement, consensus will be reached by discussion between four review authors (CMB, PK, CB and JJ).

### Data extraction and management

Data on eligible studies will be extracted and summarised using a pre-agreed data extraction summary form. This form will include study design, baseline characteristics of participants including number of participants, age, gender, ethnicity, type of diabetes, information on exposure, outcome measure (lower extremity amputation) and other relevant data. Risk of foot disease at baseline will be assessed using the Diabetic foot risk stratification and triage system from the SIGN (Scottish Intercollegiate Guidelines Network) guidelines (Appendix 1). If the data required for the review is missing from the published article, the authors will be contacted.

## Assessment of quality in included studies

A modified version of a checklist developed by Downs and Black for assessing the methodological quality of both randomised and non-randomised studies of health care interventions will be used to critically appraise the studies in this review [23].

## Assessment of heterogeneity

All eligible studies will be included in the data analysis. If data are too scarce or the quality of the studies is inadequate or results are too varied to present in numerical form, the authors will perform a narrative qualitative summary. If appropriate, meta-analysis will be attempted to pool outcome data. Either a fixed or random effects model will be used depending on the heterogeneity between studies. The most suitable model will be chosen after assessing the  $I^2$  statistic for heterogeneity.

## Pilot Results

Preliminary searches of the electronic databases have yielded approximately 500 titles & abstracts for initial screening.

## REFERENCES

1. Vamos EP, Bottle A, Edmonds ME, Valabhji J, Majeed A, Millett C. Changes in the Incidence of Lower Extremity Amputations in Individuals With and Without Diabetes in England Between 2004 and 2008. *Diabetes Care* 2010;**33**(12):2592-97 doi: 10.2337/dc10-0989[published Online First: Epub Date].
2. Moxey P, Gogalniceanu P, Hinchliffe R, et al. Lower extremity amputations—a review of global variability in incidence. *Diabetic Medicine* 2011;**28**(10):1144–53
3. Turner R, Holman R, Stratton I, et al. Tight blood pressure control and risk of macrovascular and microvascular complications in type 2 diabetes: UKPDS 38. *BMJ* 1998;**317**(7160):703-13
4. Intensive blood-glucose control with sulphonylureas or insulin compared with conventional treatment and risk of complications in patients with type 2 diabetes (UKPDS 33). UK Prospective Diabetes Study (UKPDS) Group. *Lancet* 1998;**352**(9131):837-53 doi: S0140673698070196 [pii][published Online First: Epub Date].
5. Effect of intensive blood-glucose control with metformin on complications in overweight patients with type 2 diabetes (UKPDS 34). UK Prospective Diabetes Study (UKPDS) Group. *Lancet* 1998;**352**(9131):854-65 doi: S0140673698070378 [pii][published Online First: Epub Date].
6. DCCT. The Effect of Intensive Treatment of Diabetes on the Development and Progression of Long-Term Complications in Insulin-Dependent Diabetes Mellitus. *New England Journal of Medicine* 1993;**329**(14):977-86 doi: doi:10.1056/NEJM199309303291401[published Online First: Epub Date].
7. EDIC. Epidemiology of Diabetes Interventions and Complications (EDIC). Design, implementation, and preliminary results of a long-term follow-up of the Diabetes Control and Complications Trial cohort. *Diabetes Care* 1999;**22**(1):99-111 doi: 10.2337/diacare.22.1.99[published Online First: Epub Date].
8. Boulton AJ. Lowering the risk of neuropathy, foot ulcers and amputations. *Diabet Med* 1998;**15** Suppl 4:S57-9 doi: 10.1002/(sici)1096-9136(1998120)15:4+<s57::aid-dia741>3.0.co;2-d[published Online First: Epub Date].
9. Apelqvist J, Larsson J. What is the most effective way to reduce incidence of amputation in the diabetic foot? *Diabetes/metabolism research and reviews* 2000;**16**(S1):S75-S83
10. Singh N, Armstrong DG, Lipsky BA. Preventing foot ulcers in patients with diabetes. *JAMA* 2005;**293**(2):217-28

- 1
- 2
- 3 11. IDF. Position Statement - the Diabetic Foot. Secondary Position Statement - the Diabetic Foot.
- 4 <http://www.idf.org/position-statement-diabetic-foot>.
- 5 12. Adler AI, Boyko EJ, Ahroni JH, Smith DG. Lower-extremity amputation in diabetes. The
- 6 independent effects of peripheral vascular disease, sensory neuropathy, and foot ulcers.
- 7 Diabetes Care 1999;**22**(7):1029
- 8 13. Pecoraro R, Reiber G, Burgess E. Pathways to diabetic limb amputation. Basis for prevention.
- 9 Diabetes Care 1990;**13**(5):513
- 10 14. Agardh E, Allebeck P, Hallqvist J, Moradi T, Sidorchuk A. Type 2 diabetes incidence and socio-
- 11 economic position: a systematic review and meta-analysis. International Journal of
- 12 Epidemiology 2011 doi: 10.1093/ije/dyr029[published Online First: Epub Date]].
- 13 15. Mayfield J, Reiber G, Sanders L, Janisse D, Pogach L. Preventive foot care in people with diabetes.
- 14 Diabetes Care 1998;**21**(12):2161
- 15 16. ADA. Position Statement: Preventive foot care in people with diabetes. . Diabetes Care
- 16 1998;**21**:2178 – 79
- 17 17. ADA. Preventive Foot Care in People With Diabetes. Diabetes Care 2003;**26**(suppl 1):s78-s79 doi:
- 18 10.2337/diacare.26.2007.S78[published Online First: Epub Date]].
- 19 18. ADA. Standards of Medical Care in Diabetes. Diabetes Care 2005;**28**(suppl 1):s4-s36 doi:
- 20 10.2337/diacare.28.suppl\_1.S4[published Online First: Epub Date]].
- 21 19. Boulton AJM, Armstrong DG, Albert SF, et al. Comprehensive Foot Examination and Risk
- 22 Assessment. Diabetes Care 2008;**31**(8):1679-85 doi: 10.2337/dc08-9021[published Online
- 23 First: Epub Date]].
- 24 20. SIGN. Management of diabetes. A national clinical guideline March 2010.
- 25 <http://www.sign.ac.uk/pdf/sign116.pdf>.
- 26 21. Dorresteijn Johannes AN, Kriegsman Didi MW, Valk Gerlof D. Complex interventions for
- 27 preventing diabetic foot ulceration. Cochrane Database of Systematic Reviews 2010; (1).
- 28 <http://www.mrw.interscience.wiley.com/cochrane/clsysrev/articles/CD007610/frame.html>.
- 29 22. Dorresteijn Johannes AN, Kriegsman Didi MW, Assendelft Willem JJ, Valk Gerlof D. Patient
- 30 education for preventing diabetic foot ulceration. Cochrane Database of Systematic Reviews
- 31 2010; (5).
- 32 <http://www.mrw.interscience.wiley.com/cochrane/clsysrev/articles/CD001488/frame.html>.
- 33 23. Downs SH, Black N. The feasibility of creating a checklist for the assessment of the
- 34 methodological quality both of randomised and non-randomised studies of health care
- 35 interventions. Journal of Epidemiology and Community Health 1998;**52**(6):377-84 doi:
- 36 10.1136/jech.52.6.377[published Online First: Epub Date]].
- 37
- 38
- 39
- 40
- 41
- 42
- 43
- 44
- 45
- 46
- 47
- 48
- 49
- 50
- 51
- 52
- 53
- 54
- 55
- 56
- 57
- 58
- 59
- 60

Appendices

Appendix 1 Diabetic foot risk stratification and triage

**DIABETIC FOOT RISK STRATIFICATION AND TRIAGE**

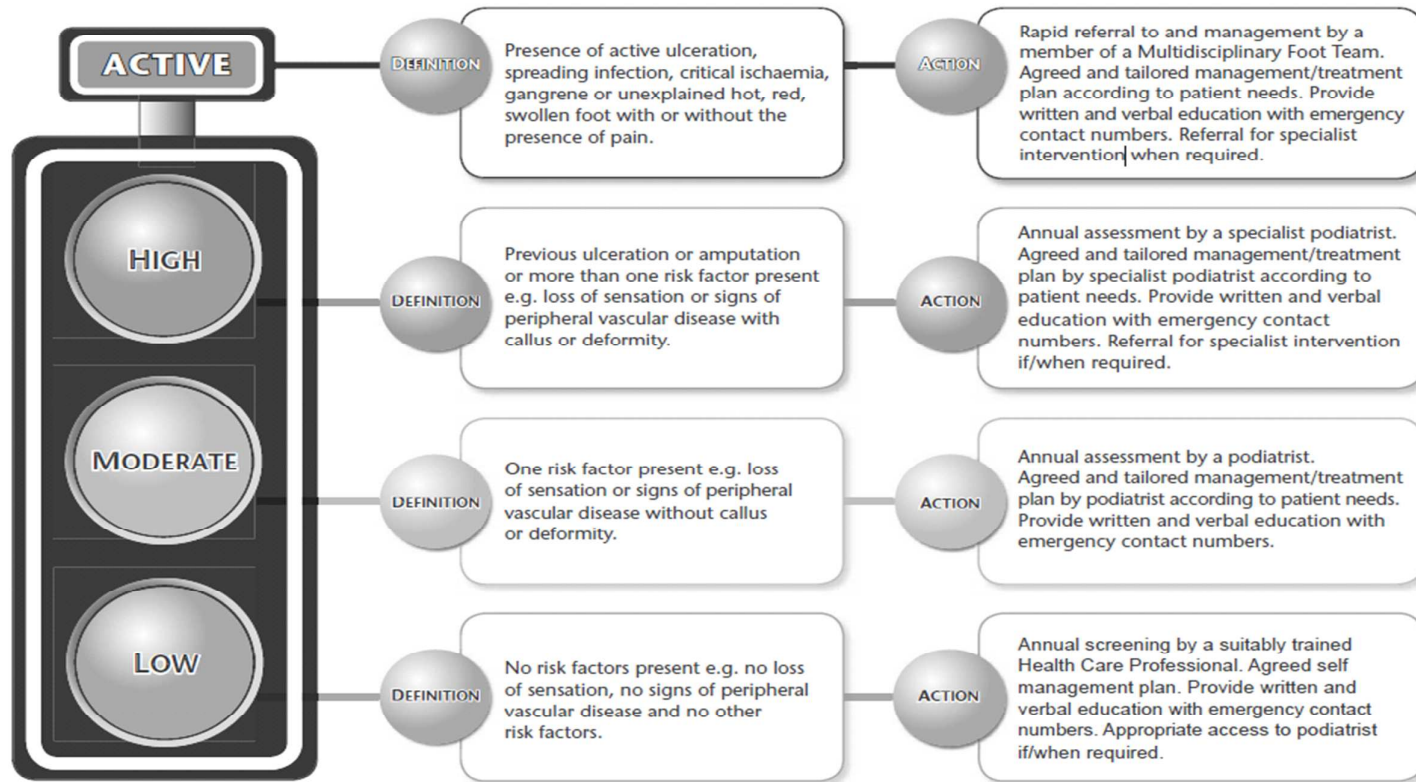

Produced by the Scottish Diabetes Group - Foot Action Group

These risk categories relate to the use of the SCI-DC foot risk stratification tool

Appendix 2 Search Strategy for PUBMED (1966 – Sept 25<sup>th</sup> 2011)

1. Diabetes mellitus (MeSH)
2. Diabet\*
3. 1 or 2
4. Amputation (MeSH)
5. Amput\*
6. 4 or 5
7. Podiatry (MeSH)
8. Podiatr\*
9. 7 or 8
10. Case-control study (MeSH)
11. Case-control\* (free text)
12. Cohort studies (MeSH)
13. Cohort\* (free text)
14. Retrospective Studies (MeSH)
15. Prospective Studies (MeSH)
16. Journal Article (Publication type)
17. Clinical Trial (Publication Type)
18. Randomized Controlled Trial (Publication Type)
19. 10 or 11 or 12 or 13 or 14 or 14 or 16 or 17 or 18
20. 3 and 6 and 9 and 19

Results: 184

**Appendix 3 Search Strategy for CINAHL (1981 – Sept 25<sup>th</sup> 2011)**

1. (MH "Diabetes Mellitus+") OR (MH "Diabetes Mellitus, Insulin-Dependent") OR (MH "Diabetes Mellitus, Non-Insulin-Dependent")
2. Diabet\*
3. 1 or 2
4. (MH "Amputation+") OR (MH "Above-Knee Amputation") OR (MH "Amputation Stumps") OR (MH "Amputation Care (Iowa NIC)")
5. Amput\*
6. 4 or 5
7. Podiatric Assessment") OR (MH "Education, Podiatry") OR (MH "Surgery, Podiatric+") OR (MH "Podiatric Care")
8. Podiatr\*
9. 7 or 8
10. (MH "Case Control Studies+")
11. Case-control\* (free text)
12. Cohort studies (MeSH)
13. Cohort\* (free text)
14. (MH "Retrospective Panel Studies") OR (MH "Retrospective Design")
15. (MH "Prospective Studies") OR (MH "Concurrent Prospective Studies") OR (MH "Nonconcurrent Prospective Studies")
16. (MH "Electronic Publications+") OR (MH "Electronic Journals") OR (MH "Publication Formats+")
17. Article (free text)
18. (MH "Clinical Trials+")
19. (MH "Randomized Controlled Trials")
20. 10 or 11 or 12 or 13 or 14 or 15 or 16 or 17 or 18 or 19
21. 3 and 6 and 9 and 20

Results: 43

Appendix 4 Search Strategy for EMBASE (1974 – Sept 25<sup>th</sup> 2011)

1. 'diabetes mellitus'/exp
2. diabet\*
3. 1 or 2
4. 'amputation'/exp
5. amput\*
6. 4 or 5
7. 'podiatry'/exp
8. podiatr\*
9. 7 or 8
10. 'case control study'/exp – (mesh/emtree)
11. 'case control study'/exp OR 'case control study' – (case control\*)
12. 'cohort study'/exp – (mesh/emtree)
13. Cohort\*
14. 'retrospective study'/exp
15. 'prospective study'/exp
16. 'article'/exp
17. 'clinical trial'/exp
18. 'randomized controlled trial'/exp
19. 10 or 11 or 12 or 13 or 14 or 15 or 16 or 17 or 18
20. 3 and 6 and 9 and 19

Results: 246



Appendix 5 Search Strategy for Cochrane (1993 – Sept 25<sup>th</sup> 2011)

1. MeSH descriptor Diabetes Mellitus explode all trees in all MeSH products
2. Diabet\*
3. 1 or 2
4. [MeSH descriptor](#) Amputation [explode all trees](#)
5. [Amput\\*](#)
6. 4 or 5
7. [MeSH descriptor](#) Podiatry [explode all trees](#)
8. Podiatr\*
9. 7 or 8
10. MeSH descriptor Case-Control Studies explode all trees in all MeSH products
11. Case control stud\*
12. MeSH descriptor Cohort Studies explode all trees in all MeSH products
13. Cohort stud\*
14. MeSH descriptor Retrospective Studies explode all trees in all MeSH products
15. MeSH descriptor Prospective Studies explode all trees in all MeSH products
16. Article
17. Clinical Trial
18. Randomised Control Trial
19. 10 or 11 or 12 or 13 or 14 or 15 or 16 or 17 or 18
20. 3 and 6 and 9 and 19

Results: 25

13 Cochrane Reviews

2 Other Reviews

6 Clinical Trials

2 Technology Assessments

2 Economic Evaluations

1 Cochrane Group

Appendix 6 Table of Excluded Studies

| Study (Author, Country, Year) | Exclusion criteria                    | Details                                                                                                         |
|-------------------------------|---------------------------------------|-----------------------------------------------------------------------------------------------------------------|
| Driver, 2010[39]              | Intervention                          | Podiatric lead limb preservation team - No data on contact with a podiatrist as the intervention available      |
| Ellis, 2010[40]               | Design / Outcome                      | Audit / Diabetic Foot Complication                                                                              |
| Zayed, 2009[41]               | Intervention                          | Podiatry as part of Multidisciplinary team - No data on contact with a podiatrist as the intervention available |
| Snyder, 2006[42]              | Design<br>No reporting of association | Chart review/case series,<br>Intervention on subset of patients, comparison group not available for this subset |
| Robbins, 2006[43]             | Intervention                          | Podiatry as part of Multidisciplinary team - No data on contact with a podiatrist as the intervention available |
| El Sakka 2006[30]             | Intervention                          | Podiatry as part of Multidisciplinary team - No data on contact with a podiatrist as the intervention available |
| Schraer, 2004[44]             | Intervention                          | Program                                                                                                         |
| Dargis, 1999[31]              | Intervention                          | Podiatry as part of Multidisciplinary team - No data on contact with a podiatrist as the intervention available |
| Van Gils, 1999[32]            | Intervention                          | Podiatry as part of Multidisciplinary team - No data on contact with a podiatrist as the intervention available |
| Del Aguila, 1994[45]          | No report of association              | Number of podiatry visits in 12 months described - Unable to determine whom were not exposed to podiatry        |
| Malone, 1989[46]              | Intervention                          | Intervention involved education by podiatrists, not treatment                                                   |
| Crane, USA, 1999[47]          | Intervention                          | Podiatry-established critical pathway                                                                           |
| Carrington, UK, 2001[48]      | Intervention                          | Program including podiatry                                                                                      |

|                                |                                  |                                                                                                               |
|--------------------------------|----------------------------------|---------------------------------------------------------------------------------------------------------------|
| Hamalainen, Finland, 1998 [49] | Study described in another paper |                                                                                                               |
| McCabe, UK, 1998 [50]          | Intervention                     | Clinical foot screening programme, only subset of population seen by podiatrist, no comparison group involved |

For peer review only

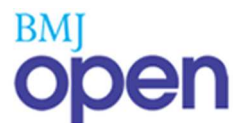

**Does contact with a podiatrist prevent the occurrence of a lower extremity amputation in people with diabetes? A systematic review and meta-analysis**

|                                 |                                                                                                                                                                                                                                                                              |
|---------------------------------|------------------------------------------------------------------------------------------------------------------------------------------------------------------------------------------------------------------------------------------------------------------------------|
| Journal:                        | <i>BMJ Open</i>                                                                                                                                                                                                                                                              |
| Manuscript ID:                  | bmjopen-2012-002331.R1                                                                                                                                                                                                                                                       |
| Article Type:                   | Research                                                                                                                                                                                                                                                                     |
| Date Submitted by the Author:   | 19-Feb-2013                                                                                                                                                                                                                                                                  |
| Complete List of Authors:       | Buckley, Claire; UCC,<br>Perry, Ivan; University College Cork, Department of Epidemiology and Public Health<br>Bradley, Colin; University College Cork, Dept of General Practice<br>Kearney, Patricia; University College Cork, Department of Epidemiology and Public Health |
| <b>Primary Subject Heading</b>: | Diabetes and endocrinology                                                                                                                                                                                                                                                   |
| Secondary Subject Heading:      | Health services research, Evidence based practice, Surgery                                                                                                                                                                                                                   |
| Keywords:                       | Diabetic foot < DIABETES & ENDOCRINOLOGY, VASCULAR SURGERY, Organisation of health services < HEALTH SERVICES ADMINISTRATION & MANAGEMENT                                                                                                                                    |
|                                 |                                                                                                                                                                                                                                                                              |

SCHOLARONE™  
Manuscripts

Only

1  
2  
3  
4  
5 **DOES CONTACT WITH A PODIATRIST PREVENT THE OCCURRENCE OF A**  
6 **LOWER EXTREMITY AMPUTATION IN PEOPLE WITH DIABETES? A SYSTEMATIC**  
7 **REVIEW AND META-ANALYSIS**  
8  
9

10  
11 **Short title**

12 Contact with podiatry and lower extremity amputation in people with diabetes

13  
14 CM BUCKLEY (CMB)<sup>1,2</sup>, IJ PERRY (IJP)<sup>2</sup>, CP BRADLEY (CPB)<sup>1</sup>, PM KEARNEY (PMK)<sup>2</sup>  
15

16 1. Dept of General Practice, UCC, Western Gateway Building, Cork, Ireland

17 2. Dept of Epidemiology and Public Health, UCC, Western Gateway Building, Cork, Ireland,  
18

19  
20 **Corresponding author**

21 Claire Buckley, Department of General Practice, Room 2.57, Western Gateway Building, University  
22 College Cork, Ireland

23 Tel No: 00353 86 6020313, Fax No: 00353 21 4205469,

24 Email: Claire.buckley@ucc.ie  
25

26  
27 **Keywords**

28 Podiatry, Amputation, Diabetes Mellitus, Systematic Review, Meta-analysis  
29

30  
31 **Word Count**

32 Abstract: 300 words

33 Main text: 2,696 words (excluding title page, abstract, references, figures, tables and appendices)  
34  
35  
36  
37  
38  
39  
40  
41  
42  
43  
44  
45  
46  
47  
48  
49  
50  
51  
52  
53  
54  
55  
56  
57  
58  
59  
60

## ABSTRACT

### Objective

To determine the effect of contact with a podiatrist on the occurrence of Lower Extremity Amputation (LEA) in people with diabetes.

### Design & data sources

We conducted a systematic review of available literature on the effect of contact with a podiatrist on the risk of LEA in people with diabetes. Eligible studies, published in English, were identified through searches of PUBMED, CINAHL, EMBASE, and Cochrane databases. The key terms, 'podiatry', 'amputation' and 'diabetes', were searched as Medical Subject Heading ( MeSH) terms. Reference lists of selected papers were hand-searched for additional articles. No date restrictions were imposed.

### Study Selection

Published randomised and analytical observational studies of the effect of contact with a podiatrist on the risk of LEA in people with diabetes were included. Cross-sectional studies, review articles, chart reviews and case series were excluded. Two reviewers independently assessed titles, abstracts, and full articles to identify eligible studies and extracted data related to study design, characteristics of participants, interventions, outcomes, control for confounding factors and risk estimates.

### Analysis

Meta-analysis was performed separately for randomised and non-randomised studies. Relative risks (RRs) with 95% confidence intervals (CIs) were estimated with fixed and random effects models as appropriate.

### Results

Six studies met the inclusion criteria and five provided data included in meta-analysis. The identified studies were heterogenous in design and included people with diabetes at both low and high risk of amputation. Contact with a podiatrist did not significantly affect the RR of LEA in a meta-analysis of available data from Randomised Controlled Trials (RCTs); (1.41, 95% CI 0.20-9.78, 2 RCTs) or from cohort studies; (0.73, 95% CI 0.39-1.33, 3 Cohort studies with 4 substudies in one cohort).

### Conclusions

There is very limited data available on the effect of contact with a podiatrist on the risk of LEA in people with diabetes.

## ARTICLE SUMMARY

### Article Focus

- People with diabetes are at increased risk of Lower Extremity Amputation (LEA). As the prevalence of diabetes escalates worldwide, it is anticipated that there will be an increase in the number of LEAs.
- It is assumed that contact with a podiatrist prevents the occurrence of a LEA.
- This systematic review aims to determine from available literature the documented effect of contact with a podiatrist on the occurrence of a LEA in people with diabetes.

### Key Messages

- Very limited data is available and the authors conclude that there is insufficient evidence to determine whether contact with a podiatrist has an effect on the risk of LEA in people with diabetes.
- Some existing studies suggest that contact with a podiatrist has a positive effect on shorter term outcomes including patient knowledge of foot care and ulcer recurrence.
- Further research on the long-term outcome of LEA is warranted.

### Strengths and Limitations

- This is the first systematic review which investigates if contact with a podiatrist prevents the occurrence of a LEA in people with diabetes.
- Failure to demonstrate an effect on this long-term outcome is most likely due to limitations of available studies.
- Limitations include that studies in this systematic review looked at different sample populations ranging from patients with low baseline risk to patients with active disease. Also, included RCTs were underpowered to detect a significant difference for the outcome of LEA.

## INTRODUCTION

A worldwide diabetes epidemic is unfolding[1]. Diabetes is associated with a significantly increased risk of LEA (Lower Extremity Amputation). LEA rates vary between populations with estimates ranging from 46 to 9,600 per 10<sup>5</sup> people with diabetes [2]. A number of factors influence the occurrence of a LEA in people with diabetes; including hypertension, obesity and hyperglycaemia [3] [4]. In the foot, previous ulceration, infection and ischaemia are proven risk factors [5]. Nearly 85% of amputations begin as foot ulcers among persons with diabetes [6]. Protective factors include control of clinical parameters and screening to identify those people at high risk and many LEAs are preventable [7] [8]. The effects of clinical and socio-demographic risk factors on the occurrence of a LEA have been well documented in people with diabetes [9] [10] [11] [12].

In 2008, a task force report by the Foot Care Interest Group of the American Diabetes Association, which included podiatrists, stated that all people with diabetes should be assigned to a foot risk category [13]. These categories were designed to direct referral to and subsequent therapy by a speciality clinician or team but did not refer specifically to the role of podiatry. Recent guidelines from Scotland outline a diabetic risk stratification and triage tool, highlighting which people need podiatry referral. According to these guidelines, all patients classified as moderate risk (i.e. at least one risk factor present), severe risk or with active disease require podiatry review [14]. Podiatry is practiced as a speciality in many countries and in many English-speaking countries, the older term of 'chiropodist' may still be used. According to the National Health Service in the UK, there is no difference between a chiropodist and a podiatrist [15]. It is assumed that podiatrists prevent LEAs by treating existing disease and educating people with diabetes on proper foot care. However, the effect of patient contact with a podiatrist on the risk of LEA in people with diabetes is unproven.

Two previous Cochrane reviews by Dorresteijn et al. have looked at firstly the effect of an integrated care approach and secondly the effect of patient education on the outcome of LEA in people with diabetes [16] [17]. The first of these reviews found no high quality evidence evaluating an integrated care approach and insufficient evidence of benefit in preventing diabetic foot ulceration [16]. The second review, updated in 2012, concluded that there is insufficient robust evidence that limited patient education alone is effective in achieving clinically relevant reductions in ulcer and LEA incidence [17]. Individual patient contact with a podiatrist was not examined as an intervention in either review. Thus, the objective of the present systematic review of published literature is to examine the effect of contact with a podiatrist on risk of LEA in people with diabetes.

## METHODS

The research question, inclusion and exclusion criteria and proposed methods of analysis were specified in advance and documented in a protocol (attached as supplementary file).

### Search Strategy

Pubmed, CINAHL, EMBASE (Excerpta Medica), and Cochrane databases were searched to identify relevant studies published up to and including September 25<sup>th</sup> 2011. The key terms, 'podiatry', 'amputation' and 'diabetes', were searched as Medical Subject Heading (MeSH) terms. Randomised and observational studies, published in English, which reported the effect of contact with a



1  
2  
3 podiatrist on risk of LEA in people with diabetes (type 1 or 2), were included. No date restrictions  
4 were imposed. Cross-sectional studies, review articles, non-systematic reviews, chart reviews and  
5 case series were excluded. A manual search of references cited in relevant articles was performed.  
6 All potentially eligible studies were independently reviewed by two authors (CMB and PMK).  
7  
8

### 9 **Data abstraction and quality assessment:**

10 Using a standardised data collection form, two reviewers (CMB, PMK) independently abstracted  
11 information on study design, year of study, characteristics of participants, interventions and  
12 outcomes, control for potential confounding factors and risk estimates. A modified version of a  
13 checklist developed by Downs and Black for assessing the methodological quality of both  
14 randomised and non-randomised studies of health care interventions was used to critically appraise  
15 the studies in this review [18]. Inconsistencies between reviewers were discussed and resolved  
16 through consensus.  
17  
18

### 19 **Statistical Analysis**

20 Review Manager Software Version 5 (Revman 5.0; the Cochrane Collaboration, Oxford, England) and  
21 STATA Version 12IC were used for statistical analysis. The relative risk (RR) with 95% CI was recorded  
22 for included studies. One study presented individual results for four various stages of disease so this  
23 study was analysed as 4 substudies. Meta-analysis was performed separately for randomised and  
24 non-randomised studies, using either the fixed or random effects model as appropriate. Statistical  
25 heterogeneity was assessed with Cochran's *Q* statistic. Cochran's *Q* is computed by summing the  
26 squared deviations of each study's estimate from the overall meta-analytic estimate, weighting each  
27 study's contribution in the same manner as in the meta-analysis. P-values were obtained by  
28 comparing the statistic with a  $\chi^2$  distribution with  $k-1$  degrees of freedom (where  $k$  is the number of  
29 studies) [19]. To assess publication bias, a funnel plot of the overall estimate and its standard error  
30 (SE) was derived.  
31  
32  
33  
34  
35  
36

## 37 **RESULTS**

38 Four hundred and ninety-nine titles were retrieved from searches of electronic databases.  
39 Duplicates (138) were removed and 361 titles/abstracts were reviewed. Eighteen papers were  
40 considered for review after initial screening of titles and abstracts. Three further studies were  
41 identified as potentially eligible from reference checking. After reviewing the full text articles, 6  
42 studies met the inclusion criteria; 2 RCTs and 4 cohort studies (figure 1)[20]. Studies were excluded  
43 because of study design e.g. chart review/audit; intervention e.g. contact with a multidisciplinary  
44 team instead of contact with a podiatrist; or in one case, the study was described in another article  
45 already included in this systematic review.  
46  
47  
48

49 Table 1 describes the included studies according to study design, participants, interventions and  
50 outcomes. Quality of included studies was assessed and all studies were deemed of suitable quality  
51 for inclusion (tables 2 & 3). Risk of foot disease at baseline was assessed using the Diabetic foot risk  
52 stratification and triage system from the SIGN (Scottish Intercollegiate Guidelines Network)  
53 guidelines (Appendix 1) [14]. Results of included studies are presented in table 4.  
54  
55

56 Results from available studies were pooled together in separate meta-analyses for RCTs and  
57 observational studies. Five of these studies provided sufficient data to allow meta-analysis. For  
58  
59  
60

1  
2  
3 RCTs, the fixed effects model was applied ( $Q=0.328$ ,  $p=0.567$ ) and for cohort studies, the random  
4 effects model is reported as there was evidence of significant heterogeneity between the cohort  
5 studies ( $Q=32.698$ ,  $p=0.000$ ). Meta-analysis of the two RCTs yielded an insignificant pooled RR of  
6 1.41 (95% CI 0.20-9.78) while meta-analysis of the cohort studies also yielded an insignificant pooled  
7 RR of 0.73 (95% CI 0.39-1.33) (figure 2).  
8  
9

10 Data required for inclusion in the meta-analysis was unavailable for 1 eligible study. Lavery et al.  
11 compared people with diabetes on dialysis and people with diabetes with a history of a healed ulcer.  
12 During a 30-month evaluation period, only 30% of patients from both groups combined were seen  
13 for preventative care prior to ulceration. The amputation incidence density was high in both groups  
14 (dialysis group 58.7 and ulcer group 13.1 per 1,000 person-years) [21]. However, it was not possible  
15 to extract the LEA event rate in those who did or did not have contact with a podiatrist.  
16  
17

18 Visual inspection of the funnel plot produced for the included studies shows no strong evidence of  
19 publication bias (figure 3).  
20  
21

## 22 **DISCUSSION**

23  
24 In this systematic review, we conclude that there is insufficient evidence to determine whether  
25 contact with a podiatrist has an effect on LEA in people with diabetes.  
26  
27

### 28 **Strengths and limitations of this review**

29 This is the first systematic review that the authors are aware of that investigates if contact with a  
30 podiatrist prevents the occurrence of a lower extremity amputation in patients with diabetes. A  
31 thorough literature search examining multiple databases was undertaken and 6 studies with 2  
32 different study designs were included. While individual study design meta-analysis was performed  
33 in an effort to pool the available data, we acknowledge that heterogeneity exists between studies  
34 included in the meta-analysis in terms of baseline diabetic foot risk and type of intervention.  
35  
36

37 Included studies looked at different sample populations ranging from patients with low baseline risk  
38 to patients with active disease. For example, Ronnema et al. recruited patients with diabetes from  
39 the national drug imbursement register in Finland which is representative of the total population  
40 with diabetes [22]. However, Plank et al. recruited patients with diabetes from a tertiary referral  
41 centre which represents a population of patients with diabetes that have developed complications  
42 requiring referral to a tertiary centre [23]. In 5 of the 6 included studies, the population at risk were  
43 patients with diabetes. However, Sowell et al. examined a population mix of patients with diabetes,  
44 PVD and gangrene [24]. It was decided to include this study due to the dearth of research in this  
45 area. This difference in populations studied between the Sowell paper and the other 5 studies needs  
46 to be highlighted as a limitation in this review.  
47  
48  
49

50 The diabetic foot risk of the participants at baseline (low-active) reflects the different treatment  
51 settings at recruitment and highlights heterogeneity amongst the studies (table 1). Cochran's  $Q$   
52 statistic was used to assess heterogeneity. For RCTs, the fixed effects model was appropriate but  
53 this meta-analysis is limited as there are only 2 included studies. For cohort studies, the  $Q$  statistic of  
54 32.698 ( $p=0.000$ ) indicated that strong heterogeneity existed so the random effects model was  
55 applied to account for both random variability and the variability in effects among the studies.  
56 However, use of the random effects model limits the conclusions that can be drawn from the meta-  
57  
58  
59  
60

1  
2  
3 analysis [25]. 'A priori' sensitivity analyses were planned for different levels of baseline risk but  
4 there were insufficient data.  
5

6 Sources of potential bias should be considered in relation to the observational studies. Although  
7 information was collected on potential confounders in many of the included observational studies,  
8 the analyses were not adjusted for potential confounders and sources of bias. Clinical practices may  
9 vary per individual and per location. Guidelines have been recently developed to standardise referral  
10 of patients with diabetes to podiatry [14]. Healthcare-seeking behaviours are complex and  
11 multifactorial and ethnicity and socio-economic position can influence attendance at podiatry [26]  
12 [27]. Level of disease may also influence a patient's decision to attend the podiatrist and create a  
13 self-selection bias in the patients with diabetes that attend the podiatrist. Patients that attend  
14 healthcare services in early stages of disease may be more likely to engage in other healthy lifestyle  
15 behaviours e.g. healthy diet, not smoking and this phenomenon of 'healthy user bias' has been  
16 previously documented [28]. In their retrospective cohort study, Sowell et al. reported 20 LEAs in the  
17 intervention group and 130 in the control group (noting that the population at risk in this study is  
18 patients with diabetes and/or gangrene and/or PVD) [24]. This study described the majority of  
19 included participants with the outcome of LEA. However, their analysis did not adjust for important  
20 potential confounders which limit the conclusions that can be drawn from this study.  
21  
22  
23  
24

25 The issues of bias and confounding are minimised by the gold standard technique of randomisation  
26 in RCTs. However, there is a lack of RCTs in this area. The 2 available RCTs have a lack of power as  
27 few participants had the outcome of LEA. The most likely cause of the low numbers of outcomes in  
28 the included studies is length of follow-up. LEA takes years to develop, especially from the time-  
29 point when a patient is classified as low risk. In the 1<sup>st</sup> included RCT, Plank et al. described 2 LEAs in  
30 the intervention group and 1 in the control group [23]. In the 2<sup>nd</sup> RCT, Ronnema et al. noted no LEA  
31 after 1 year of follow-up and 1 LEA in the intervention group after 7 years of follow-up [22] [16].  
32 Neither RCT was designed to assess LEA as a primary outcome and thus, had insufficient power to  
33 detect a significant difference for the outcome of LEA.  
34  
35  
36  
37

### 38 **Conclusions and Implications**

39 Two Cochrane reviews have looked at the outcome of LEA in patients with diabetes [16] [17]. These  
40 reviews concluded that there is insufficient evidence that brief educational interventions or complex  
41 interventions reduce the risk of LEA. This systematic review concludes that there is insufficient  
42 evidence that contact with a podiatrist reduces the risk of LEA in patients with diabetes. Thus, this  
43 review cannot make any recommendations about practice. To detect the true effect, adequately  
44 powered RCTs and longer follow-up studies are needed to examine the effect of contact with a  
45 podiatrist on LEA in patients with diabetes. Perhaps, podiatry programmes could be rolled out in a  
46 manner designed to answer the question of effect on outcomes such as LEA. Such studies could also  
47 assess the impact of the timing and intensity of the podiatry intervention on outcomes. Perhaps  
48 studies focusing on high-risk participants are too close in timing to the LEA event and studies of  
49 lower-risk participants would be better to detect an effect in LEA prevention.  
50  
51  
52

53 International standards recommend a multidisciplinary team should manage the footcare of a  
54 patient with diabetes [14]. Many studies have looked at the effects of a multidisciplinary team of  
55 which podiatry serves as a member of the team and found positive effects on various outcomes [29-  
56 36]. This may be a more realistic reflection of how patients with diabetes are managed; looking at  
57  
58  
59  
60

one service in isolation could be flawed as services are seldom delivered in isolation. According to the SIGN (Scottish Intercollegiate Guidelines Network) guidelines a multidisciplinary foot team should include a podiatrist, diabetes physician, orthotist, diabetes nurse specialist, vascular surgeon, orthopaedic surgeon and radiologist [14]. A systematic review of the literature looking at the effectiveness of multidisciplinary teams which include contact with a podiatrist would be useful.

### Acknowledgements

We would like to thank the authors who responded to our queries and Professor John Browne, UCC for advice on methodology.

### Declaration of Competing Interests

Nothing to declare.

### Funding

This project is partially funded by the HRB (Health Research Board), Ireland – Grant Reference Number: HPF/2009/79 and partially funded by the ICGP (Irish College of General Practitioners) Research and Education Foundation.

### Contributor statement

Claire M Buckley (CMB) conceived and designed the study, extracted the data and wrote the paper. Ivan J Perry (IJP) revised the paper. Colin P Bradley (CPB) approved the final version to be published. Patricia M Kearney (PMK) designed the study, extracted the data and wrote the paper. CMB will act as guarantor for the paper.

### Ethical Approval

None required.

### Data Sharing Statement

no additional data available.

### Abbreviations

CINAHL, Cumulative Index to Nursing and Allied Health Literature, LEA, Lower Extremity Amputation, MeSH, Medical Subject Headings, NHS, National Health Service, PVD, Peripheral Vascular Disease, RCT, Randomised Controlled Trial, SIGN, Scottish Intercollegiate Guidelines Network, UCC, University College Cork, UK, United Kingdom

### REFERENCES

1. Lam DW, LeRoith D. The worldwide diabetes epidemic. *Current Opinion in Endocrinology, Diabetes and Obesity* 2012;**19**(2):93-96 10.1097/MED.0b013e328350583a
2. Moxey P, Gogalniceanu P, Hincliffe R, et al. Lower extremity amputations—a review of global variability in incidence. *Diabetic Medicine* 2011;**28**(10):1144–53
3. Turner R, Holman R, Stratton I, et al. Tight blood pressure control and risk of macrovascular and microvascular complications in type 2 diabetes: UKPDS 38. *BMJ* 1998;**317**(7160):703-13
4. Intensive blood-glucose control with sulphonylureas or insulin compared with conventional treatment and risk of complications in patients with type 2 diabetes (UKPDS 33). UK

- 1  
2  
3 Prospective Diabetes Study (UKPDS) Group. Lancet 1998;**352**(9131):837-53 doi:  
4 S0140673698070196 [pii][published Online First: Epub Date] | .
- 5 5. Boulton AJ. Lowering the risk of neuropathy, foot ulcers and amputations. Diabet Med 1998;**15**  
6 **Suppl 4**:S57-9 doi: 10.1002/(sici)1096-9136(1998120)15:4+<s57::aid-dia741>3.0.co;2-  
7 d[published Online First: Epub Date] | .
- 8 6. Apelqvist J, Larsson J. What is the most effective way to reduce incidence of amputation in the  
9 diabetic foot? Diabetes/metabolism research and reviews 2000;**16**(S1):S75-S83
- 10 7. Singh N, Armstrong DG, Lipsky BA. Preventing foot ulcers in patients with diabetes. JAMA  
11 2005;**293**(2):217-28 doi: 10.1001/jama.293.2.217[published Online First: Epub Date] | .
- 12 8. IDF. Position Statement - the Diabetic Foot. Secondary Position Statement - the Diabetic Foot.  
13 <http://www.idf.org/position-statement-diabetic-foot>.
- 14 9. Adler A, Erqou S, Lima TAS, et al. Association between glycated haemoglobin and the risk of lower  
15 extremity amputation in patients with diabetes mellitus—review and meta-analysis.  
16 Diabetologia 2010;**53**(5):840-49
- 17 10. Adler AI, Boyko EJ, Ahroni JH, et al. Lower-extremity amputation in diabetes. The independent  
18 effects of peripheral vascular disease, sensory neuropathy, and foot ulcers. Diabetes Care  
19 1999;**22**(7):1029
- 20 11. Pecoraro R, Reiber G, Burgess E. Pathways to diabetic limb amputation. Basis for prevention.  
21 Diabetes Care 1990;**13**(5):513
- 22 12. Agardh E, Allebeck P, Hallqvist J, et al. Type 2 diabetes incidence and socio-economic position: a  
23 systematic review and meta-analysis. International Journal of Epidemiology 2011 doi:  
24 10.1093/ije/dyr029[published Online First: Epub Date] | .
- 25 13. Boulton AJM, Armstrong DG, Albert SF, et al. Comprehensive Foot Examination and Risk  
26 Assessment. Diabetes Care 2008;**31**(8):1679-85 doi: 10.2337/dc08-9021[published Online  
27 First: Epub Date] | .
- 28 14. SIGN. Management of diabetes. A national clinical guideline March 2010.  
29 <http://www.sign.ac.uk/pdf/sign116.pdf>.
- 30 15. NHS. Careers in Detail. Secondary Careers in Detail.  
31 <http://www.nhs.uk/nhs-careers/nhs-careers-in-detail/Default.aspx?Id=280>.
- 32 16. Dorresteijn Johannes AN, Kriegsman Didi MW, Valk Gerlof D. Complex interventions for  
33 preventing diabetic foot ulceration. Cochrane Database of Systematic Reviews 2010; (1).  
34 <http://www.mrw.interscience.wiley.com/cochrane/clsysrev/articles/CD007610/frame.html>.
- 35 17. Dorresteijn Johannes AN KDM, Assendelft Willem JJ, Valk Gerlof D. Patient education for  
36 preventing diabetic foot ulceration. Cochrane Database of Systematic Reviews Updated;  
37 John Wiley & Sons, Ltd.  
38 <http://onlinelibrary.wiley.com/doi/10.1002/14651858.CD001488.pub4/abstract> (accessed  
39 2012).
- 40 18. Downs SH, Black N. The feasibility of creating a checklist for the assessment of the  
41 methodological quality both of randomised and non-randomised studies of health care  
42 interventions. Journal of Epidemiology and Community Health 1998;**52**(6):377-84 doi:  
43 10.1136/jech.52.6.377[published Online First: Epub Date] | .
- 44 19. Higgins JPT, Thompson SG, Deeks JJ, et al. Measuring inconsistency in meta-analyses. BMJ  
45 2003;**327**(7414):557-60 doi: 10.1136/bmj.327.7414.557[published Online First: Epub Date] | .
- 46 20. Liberati A, Altman DG, Tetzlaff J, et al. The PRISMA statement for reporting systematic reviews  
47 and meta-analyses of studies that evaluate healthcare interventions: explanation and  
48 elaboration. BMJ 2009;**339** doi: 10.1136/bmj.b2700[published Online First: Epub Date] | .
- 49 21. Lavery LA, Hunt NA, LaFontaine J, et al. Diabetic Foot Prevention. Diabetes Care 2010;**33**(7):1460-  
50 62 doi: 10.2337/dc10-0310[published Online First: Epub Date] | .
- 51 22. Ronnema T, Hamalainen H, Toikka T, et al. Evaluation of the impact of podiatrist care in the  
52 primary prevention of foot problems in diabetic subjects. Diabetes Care 1997;**20**(12):1833-7
- 53  
54  
55  
56  
57  
58  
59  
60

23. Plank J, Haas W, Rakovac I, et al. Evaluation of the Impact of Chiropracist Care in the Secondary Prevention of Foot Ulcerations in Diabetic Subjects. *Diabetes Care* 2003;**26**(6):1691-95 doi: 10.2337/diacare.26.6.1691[published Online First: Epub Date] | .
24. Sowell RD, Mangel WB, Kilczewski CJ, et al. Effect of podiatric medical care on rates of lower-extremity amputation in a Medicare population. *J Am Podiatr Med Assoc* 1999;**89**(6):312-7
25. Pereira TV, Patsopoulos NA, Salanti G, et al. Critical interpretation of Cochran's Q test depends on power and prior assumptions about heterogeneity. *Research Synthesis Methods* 2010;**1**(2):149-61 doi: 10.1002/jrsm.13[published Online First: Epub Date] | .
26. Fylkesnes K. Determinants of Health Care Utilization — Visits and Referrals. *Scandinavian Journal of Public Health* 1993;**21**(1):40-50 doi: 10.1177/140349489302100107[published Online First: Epub Date] | .
27. Adamson J, Ben-Shlomo Y, Chaturvedi N, et al. Ethnicity, socio-economic position and gender—do they affect reported health—care seeking behaviour? *Social Science & Medicine* 2003;**57**(5):895-904 doi: 10.1016/s0277-9536(02)00458-6[published Online First: Epub Date] | .
28. Jackson LA, Jackson ML, Nelson JC, et al. Evidence of bias in estimates of influenza vaccine effectiveness in seniors. *International Journal of Epidemiology* 2006;**35**(2):337-44 doi: 10.1093/ije/dyi274[published Online First: Epub Date] | .
29. Leese GP, Schofield CJ. Amputations in diabetes: A changing scene. *Practical Diabetes International* 2008;**25**(8):297-99
30. El Sakka K, Fassiadis N, Gambhir RP, et al. An integrated care pathway to save the critically ischaemic diabetic foot. *Int J Clin Pract* 2006;**60**(6):667-9 doi: 10.1111/j.1368-5031.2006.00953.x[published Online First: Epub Date] | .
31. Dargis V, Pantelejeva O, Jonushaite A, et al. Benefits of a multidisciplinary approach in the management of recurrent diabetic foot ulceration in Lithuania: a prospective study. *Diabetes Care* 1999;**22**(9):1428-31
32. Van Gils CC, Wheeler LA, Mellstrom M, et al. Amputation prevention by vascular surgery and podiatry collaboration in high-risk diabetic and nondiabetic patients. The Operation Desert Foot experience. *Diabetes Care* 1999;**22**(5):678-83
33. Meltzer DD, Pels S, Payne WG, et al. Decreasing amputation rates in patients with diabetes mellitus. An outcome study. *Journal of the American Podiatric Medical Association* 2002;**92**(8):425-28
34. Larsson J, Apelqvist J, Agardh CD, et al. Decreasing incidence of major amputation in diabetic patients: a consequence of a multidisciplinary foot care team approach? *Diabet Med* 1995;**12**(9):770-6
35. Frykberg RG. Team approach toward lower extremity amputation prevention in diabetes. *J Am Podiatr Med Assoc* 1997;**87**(7):305-12
36. Patout CA, Birke JA, Horswell R, et al. Effectiveness of a comprehensive diabetes lower-extremity amputation prevention program in a predominantly low-income African-American population. *Diabetes Care* 2000;**23**(9):1339-42 doi: 10.2337/diacare.23.9.1339[published Online First: Epub Date] | .
37. Lipscombe J, Jassal SV, Bailey S, et al. Chiroprody may prevent amputations in diabetic patients on peritoneal dialysis. *Perit Dial Int* 2003;**23**(3):255-9
38. Sloan FA, Feinglos MN, Grossman DS. Receipt of Care and Reduction of Lower Extremity Amputations in a Nationally Representative Sample of U.S. Elderly. *Health Services Research* 2010;**45**(6p1):1740-62 doi: 10.1111/j.1475-6773.2010.01157.x[published Online First: Epub Date] | .

## Figure legends

Figure 1 PRISMA flow chart: selection of studies for inclusion in review

Figure 2 Forest plots of meta- analysis of RCTs (top) and Cohort studies (bottom) with the intervention of contact with a podiatrist on left side of plot

Figure 3 Funnel plot of included studies (RCTs and Cohort studies)

## Table legends

Table 1 Characteristics of Included Studies

Table 2 Quality Assessment of Included RCTs

Table 3 Quality Assessment of Included Cohort Studies

Table 4 Results of Included Studies

## Appendices legends

Appendix 1 Diabetic foot risk stratification and triage

Appendix 2 Search Strategy for PUBMED (1966 – Sept 25<sup>th</sup> 2011)

Appendix 3 Search Strategy for CINAHL (1981 – Sept 25<sup>th</sup> 2011)

Appendix 4 Search Strategy for EMBASE (1974 – Sept 25<sup>th</sup> 2011)

Appendix 5 Search Strategy for Cochrane (1993 – Sept 25<sup>th</sup> 2011)

Appendix 6 Table of Excluded Studies

## TABLES

Table 1 Characteristics of Included Studies

| Study (Author, Country, Year)       | Type of study | Participants                                                               | Interventions                                                                                                                 | Source of data used in study | Length of follow-up                                               | Baseline risk as per diabetic foot risk stratification [14] | Outcomes                                                                                          |
|-------------------------------------|---------------|----------------------------------------------------------------------------|-------------------------------------------------------------------------------------------------------------------------------|------------------------------|-------------------------------------------------------------------|-------------------------------------------------------------|---------------------------------------------------------------------------------------------------|
| Ronnemaa, Finland, 1997[22]<br>[16] | RCT           | 530 patients with diabetes randomised<br>Intervention: 267<br>Control: 263 | Intervention: 45 minutes individual patient education<br>Podiatric care visits as necessary<br>Control: Written information   | Clinical report forms        | 1 year and 7 years                                                | Low                                                         | Primary:<br>Patient Knowledge about foot care<br>Secondary:<br>Ulcer incidence<br>Amputation rate |
| Plank, Austria, 2003[23]            | RCT           | 91 patients with diabetes randomised<br>Intervention: 47<br>Control: 44    | Intervention: Chiropodist visit at least once a month<br>Control: chiropodist treatment not specifically recommended          | Clinical report forms        | 386 days (368-424, 25 <sup>th</sup> -75 <sup>th</sup> percentile) | High (healed foot ulcers)                                   | Primary:<br>recurrence rate of ulcers<br>Secondary:<br>Amputation rate<br>Death                   |
| Sowell, USA, 1999[24]               | Cohort        | 255,256 with diabetes or PVD or gangrene followed over time                | Intervention: Podiatric Medical care – receipt of any M0101 services<br>Comparison: Did not receive podiatry (M0101) services | Medicare claims database     | 1 year                                                            | Unknown                                                     | Number of Amputations                                                                             |



1  
2  
3  
4  
5  
6  
7  
8  
9  
10  
11  
12  
13  
14  
15  
16  
17  
18  
19  
20  
21  
22  
23  
24  
25  
26  
27  
28  
29  
30  
31  
32  
33  
34  
35  
36  
37  
38  
39  
40  
41  
42  
43  
44  
45  
46  
47  
48  
49

|                              |        |                                                                                                                                                            |                                                                                                                                                                 |                                          |           |                                                                          |                                    |
|------------------------------|--------|------------------------------------------------------------------------------------------------------------------------------------------------------------|-----------------------------------------------------------------------------------------------------------------------------------------------------------------|------------------------------------------|-----------|--------------------------------------------------------------------------|------------------------------------|
| Lipscombe, Canada, 2003 [37] | Cohort | 132 patients with diabetes on PD (Peritoneal Dialysis)                                                                                                     | Intervention: Assessment, education and footcare by chiropody                                                                                                   | Medical charts                           | 3 years   | High                                                                     | Number of Amputations              |
| Lavery, USA, 2010[21]        | Cohort | 300 high-risk patients with diabetes<br>150 with an ulcer history<br>150 on dialysis followed over time                                                    | Intervention: Podiatry services - number of visits to podiatrist for prevention, ulcer treatment of other pathology                                             | Claims data & Electronic Medical Records | 30 months | High (history of foot ulcer)                                             | Amputation rate<br>Ulcer incidence |
| Sloan, UK, 2010[38]          | Cohort | 189,598 patients with diabetes followed over time<br>Participants grouped into different stages (1-4) of disease depending on severity of symptoms & signs | Intervention: Care provided by podiatrist<br>Comparison: Care provided by 'other health professional' – GP/Internist/Endocrinologist/Nurse /Physician Assistant | Medicare claims database                 | 6 years   | Stage 1: Moderate<br>Stage 2: High Stage<br>3: Active<br>Stage 4: Active | Amputation rate                    |

Table 2 Quality Assessment of Included RCTs

| Study (Author, Country, Year) | Type of study | Base Population                                                                                                       | Randomisation                                                                                                          | Blinding                                                                                             | Confounding                            | Losses to follow-up                                                                                           | Analysis                                   |
|-------------------------------|---------------|-----------------------------------------------------------------------------------------------------------------------|------------------------------------------------------------------------------------------------------------------------|------------------------------------------------------------------------------------------------------|----------------------------------------|---------------------------------------------------------------------------------------------------------------|--------------------------------------------|
| Ronnemaa, Finland, 1997 [22]  | RCT           | Community based care in Finland, receiving anti-diabetic drug treatment from the national drug reimbursement register | Randomisation performed separately for men/women and patients </> 20 years. Method of randomisation not described      | Outcome assessor blinded to baseline characteristics but no further information on blinding provided | Baseline Characteristics not described | Follow-up completed by 63% of patients in intervention group and 62% patients in control group at seven years | No intention to treat analysis undertaken  |
| Plank, Austria, 2003 [23]     | RCT           | All in routine outpatient care at hospital diabetic foot clinic in Austria                                            | Subjects were assigned a patient number in ascending order and randomly allocated to the intervention or control group | Allocation concealment ensured                                                                       | Similar Baseline Characteristics       | All patients followed up                                                                                      | Intention to treat & per protocol analysis |

1  
2  
3  
4  
5  
6  
7  
8  
9  
10  
11  
12  
13  
14  
15  
16  
17  
18  
19  
20  
21  
22  
23  
24  
25  
26  
27  
28  
29  
30  
31  
32  
33  
34  
35  
36  
37  
38  
39  
40  
41  
42  
43  
44  
45  
46  
47  
48  
49

Table 3 Quality Assessment of Included Cohort Studies

| Study (Author, Country, Year) | Type of study | Base Population                                                                                              | Confounding                                                              | Losses to follow-up                                                                                                       | Analysis                                                                                                |
|-------------------------------|---------------|--------------------------------------------------------------------------------------------------------------|--------------------------------------------------------------------------|---------------------------------------------------------------------------------------------------------------------------|---------------------------------------------------------------------------------------------------------|
| Sowell, USA, 1999 [24]        | Cohort        | All Medicare population at risk for lower extremity amputation in 1993-1994                                  | Not addressed – only looked at 1 variable – acknowledged as a limitation | No losses to follow-up                                                                                                    | Amputation incidence rates with & without exposure to podiatry                                          |
| Lipscombe, Canada, 2003 [37]  | Cohort        | Patients in Peritoneal Dialysis program at University Health Network, between January 1997 and December 1999 | Data on confounding variables collected                                  | No losses to follow-up                                                                                                    | Descriptive Stats                                                                                       |
| Lavery, USA, 2010 [21]        | Cohort        | Patients with diabetes attending Scott and White Health Plan, Texas, USA                                     | Data on confounding variables collected                                  | 150 consecutive patients with at least 30 months follow-up from the time of diagnosis recruited so no losses to follow-up | Descriptive Stats                                                                                       |
| Sloan, UK, 2010 [38]          | Cohort        | All individuals with a DM-related LEC diagnosis between 1994 and 2001                                        | Data on confounding variables collected                                  | No losses to follow-up                                                                                                    | Hazard Ratios adjusted for Medicare expenditures from care received from non-study health professionals |

Table 4 Results of Included Studies

| Study (Author, Country, Year)     | Type of study | Primary Outcome                                                                                                                                                                                                         | Baseline risk as per diabetic foot risk stratification [14]              | Relative risk of amputation with contact with a podiatrist compared to no contact with a podiatrist  |
|-----------------------------------|---------------|-------------------------------------------------------------------------------------------------------------------------------------------------------------------------------------------------------------------------|--------------------------------------------------------------------------|------------------------------------------------------------------------------------------------------|
| Ronnemaa, Finland, 1997 [22] [16] | RCT           | <u>Diabetes-related Amputation:</u><br>One year follow-up: Intervention: 0 Control: 0<br>Seven years follow-up: Intervention: 1 Control: 0                                                                              | Low                                                                      | 2.96                                                                                                 |
| Plank, Austria, 2003 [23]         | RCT           | <u>Diabetes-related Amputation:</u><br>One year follow-up: Intervention: 2 Control: 1                                                                                                                                   | High (healed foot ulcers)                                                | 0.92                                                                                                 |
| Sowell, USA, 1999 [24]            | Cohort        | <u>Amputation related to diabetes/gangrene/PVD</u><br>One year follow-up: Intervention: 20<br>Control: 130                                                                                                              | Unknown                                                                  | 0.25                                                                                                 |
| Lipscombe, Canada, 2003 [37]      | Cohort        | <u>Diabetes-related Amputation:</u><br>Amputation during any of the 3 years of the study: Intervention: 11 Control: 4                                                                                                   | High                                                                     | 2.16                                                                                                 |
| Lavery, USA, 2010 [21]            | Cohort        | <u>Diabetes-related Amputation:</u><br>Actual number of amputations not outlined<br><u>Amputation Incidence Density:</u><br>58.7 in Dialysis Group per 1,000 person years<br>13.1 in Ulcer Group per 1,000 person years | High (history of foot ulcer)                                             | Unknown                                                                                              |
| Sloan, UK, 2010 [38]              | Cohort        | <u>Diabetes-related Amputation:</u><br>Six year follow-up: actual number of amputations not outlined                                                                                                                    | Stage 1: Moderate<br>Stage 2: High<br>Stage 3: Active<br>Stage 4: Active | Stage 1 disease : 2.20<br>Stage 2 disease : 0.85<br>Stage 3 disease : 0.44<br>Stage 4 disease : 0.36 |

1  
2  
3  
4  
5  
6  
7  
8  
9  
10  
11  
12

## DOES CONTACT WITH A PODIATRIST PREVENT THE OCCURRENCE OF A LOWER EXTREMITY AMPUTATION IN PEOPLE WITH DIABETES? A SYSTEMATIC REVIEW AND META-ANALYSIS

13

### Short title

14 Contact with podiatry and lower extremity amputation in people with diabetes

15  
16 CM BUCKLEY (CMB)<sup>1,2</sup>, IJ PERRY (IJP)<sup>2</sup>, CP BRADLEY (CPB)<sup>1</sup>, PM KEARNEY (PMK)<sup>2</sup>

17  
18 1. Dept of General Practice, UCC, Western Gateway Building, Cork, Ireland

19 2. Dept of Epidemiology and Public Health, UCC, Western Gateway Building, Cork, Ireland,

20  
21

### Corresponding author

22 Claire Buckley, Department of General Practice, Room 2.57, Western Gateway Building, University  
23 College Cork, Ireland

24 Tel No: 00353 86 6020313, Fax No: 00353 21 4205469,

25 Email: Claire.buckley@ucc.ie  
26

27

### Keywords

28 Podiatry, Amputation, Diabetes Mellitus, Systematic Review, Meta-analysis  
29

30

### Word Count

31 Abstract: 300 words

32 Main text: 2,69683 words (excluding title page, abstract, references, figures, tables and appendices)  
33  
34  
35  
36  
37  
38  
39  
40  
41  
42  
43  
44  
45  
46  
47  
48  
49  
50  
51  
52  
53  
54  
55  
56  
57  
58  
59  
60

## ABSTRACT

### Objective

To determine the effect of contact with a podiatrist on the occurrence of Lower Extremity Amputation (LEA) in people with diabetes.

### Design & data sources

We conducted a systematic review of available literature on the effect of contact with a podiatrist on the risk of LEA lower extremity amputation in people with diabetes. Eligible studies, published in the English language, were identified through searches of PUBMED, CINAHL, EMBASE, and Cochrane databases. The key terms, 'podiatry', 'amputation' and 'diabetes', were searched as MeSH (Medical Subject Heading (MeSH)) terms. Reference lists of selected papers were hand-searched for additional eligible articles. No date restrictions were imposed.

### Study Selection

Published randomised and analytical observational studies of the effect of contact with a podiatrist on the risk of LEA in people with diabetes were included. Cross-sectional studies, review articles, chart reviews and case series were excluded. Two reviewers independently assessed titles, abstracts, and full articles to identify eligible studies and extracted data related to study design, characteristics of participants, interventions, and outcomes, control for potential confounding factors and risk estimates.

### Analysis

Meta-analysis was performed separately for randomised and non-randomised studies. Relative risks (RRs) with 95% confidence intervals (CIs) were estimated with fixed and random effects models as appropriate.

### Results

Six studies met the inclusion criteria and five provided data included in meta-analysis. The identified studies were heterogenous in design and included people with diabetes at both low and high risk of amputation. Contact with a podiatrist did not significantly affect the RR of LEA in a meta-analysis of available data from Randomised Controlled Trials (RCTs); (1.41, 95% CI 0.20-9.78, 2 RCTs) or from cohort studies; (0.73, 95% CI 0.394-1.33, 3 Cohort studies with 4 substudies in one cohort).

### Conclusions

There is very limited data available on the effect of contact with a podiatrist on the risk of LEA in people with diabetes.

## ARTICLE SUMMARY

### Article Focus

- People with diabetes are at increased risk of ~~LEA~~ (Lower Extremity Amputation (LEA)). As the prevalence of diabetes escalates worldwide, it is anticipated that there will be an increase in the number of LEAs.
- It is assumed that contact with a podiatrist prevents the occurrence of a LEA.
- This systematic review aims to determine from available literature the documented effect of contact with a podiatrist on the occurrence of a LEA in people with diabetes.

### Key Messages

- Very limited data is available and the authors conclude that there is insufficient evidence to determine whether contact with a podiatrist has an effect on the risk of LEA in people with diabetes.
- Some existing studies suggest that contact with a podiatrist has a positive effect on shorter term outcomes including patient knowledge of foot care and ulcer recurrence.
- Further research on the long-term outcome of LEA is warranted.

### Strengths and Limitations

- This is the first systematic review which investigates if contact with a podiatrist prevents the occurrence of a LEA in people with diabetes.
- Failure to demonstrate an effect on this long-term outcome is most likely due to limitations of available studies.
- Limitations include that studies in this systematic review looked at different sample populations ranging from patients with low baseline risk to patients with active disease. Also, included RCTs were underpowered to detect a significant difference for the outcome of LEA.

## INTRODUCTION

A worldwide diabetes epidemic is unfolding[1]. Diabetes is associated with a significantly increased risk of LEA (Lower Extremity Amputation). LEA rates vary between populations with estimates ranging from 46 to 9,600 per 10<sup>5</sup> people with diabetes [2]. A number of factors influence the occurrence of a LEA in people with diabetes; including hypertension, obesity and hyperglycaemia [3] [4]. In the foot, previous ulceration, infection and ischaemia are proven risk factors [5]. Nearly 85% of amputations begin as foot ulcers among persons with diabetes [6]. Protective factors include control of clinical parameters and screening to identify those people at high risk and many LEAs are preventable [7] [8]. The effects of clinical and socio-demographic risk factors on the occurrence of a LEA have been well documented in people with diabetes [9] [10] [11] [12].

In 2008, a task force report by the Foot Care Interest Group of the American Diabetes Association, which included podiatrists, stated that all people with diabetes should be assigned to a foot risk category [13]. These categories were designed to direct referral to and subsequent therapy by a speciality clinician or team but did not refer specifically to the role of podiatry. Recent guidelines from Scotland outline a diabetic risk stratification and triage tool, highlighting which people need podiatry referral. According to these guidelines, all patients classified as moderate risk (i.e. at least one risk factor present), severe risk or with active disease require podiatry review [14]. Podiatry is practiced as a specialty in many countries and in many English-speaking countries, the older term of "chiroprapist" may still be used. According to the National Health Service in the UK, there is no difference between a chiroprapist and a podiatrist [15]. It is assumed that podiatrists prevent LEAs by treating existing disease and educating people with diabetes on proper foot care. However, the effect of patient contact with a podiatrist on the risk of LEA in people with diabetes is unproven.

Two previous Cochrane reviews by Dorresteijn et al. have looked at firstly the effect of an integrated care approach and secondly the effect of patient education on the outcome of LEA in people with diabetes [16] [17]. The first of these reviews found no high quality evidence evaluating an integrated care approach and insufficient evidence of benefit in preventing diabetic foot ulceration [16]. The second review, updated in 2012, concluded that there is insufficient robust evidence that limited patient education alone is effective in achieving clinically relevant reductions in ulcer and LEA incidence [17]. Individual patient contact with a podiatrist was not examined as an intervention in either review. Thus, the objective of the present systematic review of published literature is to examine the effect of contact with a podiatrist on risk of LEA in people with diabetes.

## METHODS

The research question, inclusion and exclusion criteria and proposed methods of analysis were specified in advance and documented in a protocol (attached as supplementary file).

### Search Strategy

Pubmed, CINAHL, EMBASE (Excerpta Medica), and Cochrane databases were searched to identify relevant studies published up to and including September 25<sup>th</sup> 2011. The key terms, 'podiatry', 'amputation' and 'diabetes', were searched as MeSH (Medical Subject Heading (MeSH)) terms. Randomised and observational studies, published in English, which reported the effect of contact



1  
2  
3  
4  
5  
6  
7 with a podiatrist on risk of LEA in people with diabetes (type 1 or 2), were included. No date  
8 restrictions were imposed. Cross-sectional studies, review articles, non-systematic reviews, chart  
9 reviews and case series were excluded. A manual search of references cited in relevant articles was  
10 performed. All potentially eligible studies were independently reviewed by two authors (CMB and  
11 PMK).

### 12 **Data abstraction and quality assessment:**

13  
14 Using a standardised data collection form, two reviewers (CMB, PMK) independently abstracted  
15 information on study design, year of study, characteristics of participants, interventions and  
16 outcomes, control for potential confounding factors and risk estimates. A modified version of a  
17 checklist developed by Downs and Black for assessing the methodological quality of both  
18 randomised and non-randomised studies of health care interventions was used to critically appraise  
19 the studies in this review [18]. Inconsistencies between reviewers were discussed and resolved  
20 through consensus.  
21

### 22 **Statistical Analysis**

23 Review Manager Software Version 5 (Revman 5.0; the Cochrane Collaboration, Oxford, England) and  
24 STATA Version 12IC were used for statistical analysis. The **RR** (relative risk **RR**) with 95% CI was  
25 recorded for included studies. One study presented individual results for four various stages of  
26 disease so this study was analysed as 4 substudies. Meta-analysis was performed separately for  
27 randomised and non-randomised studies, using either the fixed or random effects model as  
28 appropriate. Statistical heterogeneity was assessed with Cochran's *Q* statistic. Cochran's *Q* is  
29 computed by summing the squared deviations of each study's estimate from the overall meta-  
30 analytic estimate, weighting each study's contribution in the same manner as in the meta-analysis.  
31 *P*-values were obtained by comparing the statistic with a  $\chi^2$  distribution with  $k-1$  degrees of freedom  
32 (where  $k$  is the number of studies)[19]. To assess publication bias, a funnel plot of the overall  
33 estimate and its standard error (SE) was derived.  
34  
35  
36

### 37 **RESULTS**

38 Four hundred and ninety-nine titles were retrieved from searches of electronic databases.  
39 Duplicates (138) were removed and 361 titles/abstracts were reviewed. Eighteen papers were  
40 considered for review after initial screening of titles and abstracts. Three further studies were  
41 identified as potentially eligible from reference checking. After reviewing the full text articles, 6  
42 studies met the inclusion criteria; 2 RCTs and 4 cohort studies (**PRISMA flow chart** figure 1)[20].  
43 Studies were excluded because of study design e.g. chart review/audit; intervention e.g. contact  
44 with a multidisciplinary team instead of contact with a podiatrist; or in one case, the study was  
45 described in another article already included in this systematic review.  
46  
47

48 Table 1 describes the included studies according to study design, participants, interventions and  
49 outcomes. Quality of included studies was assessed and all studies were deemed of suitable quality  
50 for inclusion (tables 2 & 3). Risk of foot disease at baseline was assessed using the Diabetic foot risk  
51 stratification and triage system from the SIGN (Scottish Intercollegiate Guidelines Network)  
52 guidelines (Appendix 1) [14]. Results of included studies are presented in table 4.  
53  
54  
55  
56  
57  
58  
59  
60

Results from available studies were pooled together in separate meta-analyses for RCTs and observational studies. Five of these studies provided sufficient data to allow meta-analysis. For RCTs, the fixed effects model was applied ( $Q=0.328$ ,  $p=0.567$ ) and for cohort studies, the random effects model is reported as there was evidence of significant heterogeneity between the cohort studies ( $Q=32.698$ ,  $p=0.000$ ). Meta-analysis of the two RCTs yielded an insignificant pooled RR of 1.41 (95% CI 0.20-9.78) while meta-analysis of the cohort studies also yielded an insignificant pooled RR of 0.73 (95% CI 0.394-1.33) (figure 2).

Data required for inclusion in the meta-analysis was unavailable for 1 eligible study. Lavery et al. compared people with diabetes on dialysis and people with diabetes with a history of a healed ulcer. During a 30-month evaluation period, only 30% of patients from both groups combined were seen for preventative care prior to ulceration. The amputation incidence density was high in both groups (dialysis group 58.7 and ulcer group 13.1 per 1,000 person-years) [21]. However, it was not possible to extract the LEA event rate in those who did or did not have contact with a podiatrist.

Visual inspection of the funnel plot produced for the included studies shows no strong evidence of publication bias (figure 3).

## DISCUSSION

In this systematic review, we conclude that there is insufficient evidence to determine whether contact with a podiatrist has an effect on LEA in people with diabetes.

### Strengths and limitations of this review

This is the first systematic review that the authors are aware of that investigates if contact with a podiatrist prevents the occurrence of a lower extremity amputation in patients with diabetes. A thorough literature search examining multiple databases was undertaken and 6 studies with 2 different study designs were included. While individual study design meta-analysis was performed in an effort to pool the available data, we acknowledge that heterogeneity exists between studies included in the meta-analysis in terms of baseline diabetic foot risk and type of intervention.

Included studies looked at different sample populations ranging from patients with low baseline risk to patients with active disease. For example, Ronnema et al. recruited patients with diabetes from the national drug reimbursement register in Finland which is representative of the total population with diabetes [22]. However, Plank et al. recruited patients with diabetes from a tertiary referral centre which represents a population of patients with diabetes that have developed complications requiring referral to a tertiary centre [23]. In 5 of the 6 included studies, the population at risk were patients with diabetes. However, Sowell et al. examined a population mix of patients with diabetes, PVD and gangrene [24]. It was decided to include this study due to the dearth of research in this area. This difference in populations studied between the Sowell paper and the other 5 studies needs to be highlighted as a limitation in this review.

The diabetic foot risk of the participants at baseline (low-active) reflects the different treatment settings at recruitment and highlights heterogeneity amongst the studies (table 1). Cochran's  $Q$  statistic was used to assess heterogeneity. For RCTs, the fixed effects model was appropriate but this meta-analysis is limited as there are only 2 included studies. For cohort studies, the  $Q$  statistic of 32.698 ( $p=0.000$ ) indicated that strong heterogeneity existed so the random effects model was

1  
2  
3  
4  
5  
6 applied to account for both random variability and the variability in effects among the studies.  
7  
8 However, use of the random effects model limits the conclusions that can be drawn from the meta-  
9 analysis [25]. 'A priori' sensitivity analyses were planned for different levels of baseline risk but  
10 there were insufficient data.

11  
12 Sources of potential bias should be considered in relation to the observational studies. Although  
13 information was collected on potential confounders in many of the included observational studies,  
14 the analyses were not adjusted for potential confounders and sources of bias. Clinical practices may  
15 vary per individual and per location. Guidelines have been recently developed to standardise referral  
16 of patients with diabetes to podiatry [14]. Healthcare-seeking behaviours are complex and  
17 multifactorial and ethnicity and socio-economic position can influence attendance at podiatry [26]  
18 [27]. Level of disease may also influence a patient's decision to attend the podiatrist and create a  
19 self-selection bias in the patients with diabetes that attend the podiatrist. Patients that attend  
20 healthcare services in early stages of disease may be more likely to engage in other healthy lifestyle  
21 behaviours e.g. healthy diet, not smoking and this phenomenon of 'healthy user bias' has been  
22 previously documented [28]. In their retrospective cohort study, Sowell et al. reported 20 LEAs in the  
23 intervention group and 130 in the control group (noting that the population at risk in this study is  
24 patients with diabetes and/or gangrene and/or PVD) [24]. This study described the majority of  
25 included participants with the outcome of LEA. However, their analysis did not adjust for important  
26 potential confounders which limit the conclusions that can be drawn from this study.  
27

28  
29 The issues of bias and confounding are ~~minimised~~ eliminated by the gold standard technique of  
30 randomisation in RCTs. However, there is a lack of RCTs in this area. The 2 available RCTs have a lack  
31 of power as few participants had the outcome of LEA. The most likely cause of the low numbers of  
32 outcomes in the included studies is length of follow-up. LEA takes years to develop, especially from  
33 the time-point when a patient is classified as low risk. In the 1<sup>st</sup> included RCT, Plank et al. described 2  
34 LEAs in the intervention group and 1 in the control group [23]. In the 2<sup>nd</sup> RCT, Ronnema et al. noted  
35 no LEA after 1 year of follow-up and 1 LEA in the intervention group after 7 years of follow-up [22]  
36 [16]. Neither RCT was designed to assess LEA as a primary outcome and thus, had insufficient power  
37 to detect a significant difference for the outcome of LEA.  
38

### 39 **Conclusions and Implications**

40  
41 Two Cochrane reviews have looked at the outcome of LEA in patients with diabetes [16], [17] [16-17].  
42 These reviews concluded that there is insufficient evidence that brief educational interventions or  
43 complex interventions reduce the risk of LEA. This systematic review concludes that there is  
44 insufficient evidence that contact with a podiatrist reduces the risk of LEA in patients with diabetes.  
45 Thus, this review cannot make any recommendations about practice. To detect the true effect,  
46 adequately powered RCTs and longer follow-up studies are needed to examine the effect of contact  
47 with a podiatrist on LEA in patients with diabetes. Perhaps, podiatry programmes could be rolled out  
48 in a manner designed to answer the question of effect on outcomes such as LEA. Such studies could  
49 also assess the impact of the timing and intensity of the podiatry intervention on outcomes. Perhaps  
50 studies focusing on high-risk participants are too close in timing to the LEA event and studies of  
51 lower-risk participants would be better to detect an effect in LEA prevention.  
52

53  
54 International standards recommend a multidisciplinary team should manage the footcare of a  
55 patient with diabetes [14]. Many studies have looked at the effects of a multidisciplinary team of  
56  
57  
58  
59  
60

1  
2  
3  
4  
5  
6  
7 which podiatry serves as a member of the team and found positive effects on various outcomes [29-  
8 36]. This may be a more realistic reflection of how patients with diabetes are managed; looking at  
9 one service in isolation could be flawed as services are seldom delivered in isolation. According to  
10 the SIGN (Scottish Intercollegiate Guidelines Network) guidelines a multidisciplinary foot team  
11 should include a podiatrist, diabetes physician, orthotist, diabetes nurse specialist, vascular surgeon,  
12 orthopaedic surgeon and radiologist [14]. A systematic review of the literature looking at the  
13 effectiveness of multidisciplinary teams which include contact with a podiatrist would be useful.  
14

### 15 **Acknowledgements**

16 We would like to thank the authors who responded to our queries and Professor John Browne, UCC  
17 for advice on methodology.  
18

### 19 **Declaration of Competing Interests**

20 Nothing to declare.  
21

### 22 **Funding**

23 This project is partially funded by the HRB (Health Research Board), Ireland – Grant Reference  
24 Number: HPF/2009/79 and partially funded by the ICGP (Irish College of General Practitioners)  
25 Research and Education Foundation.  
26

### 27 **Contributor statement**

28 Claire M Buckley (CMB) conceived and designed the study, extracted the data and wrote the paper.  
29 Ivan J Perry (IJP) revised the paper. Colin P Bradley (CPB) approved the final version to be published.  
30 Patricia M Kearney (PMK) designed the study, extracted the data and wrote the paper. CMB will act  
31 as guarantor for the paper.  
32

### 33 **Ethical Approval**

34 None required.  
35

### 36 **Data Sharing Statement**

37 There is no additional data available.  
38  
39  
40

### 41 **Abbreviations**

42 CINAHL, Cumulative Index to Nursing and Allied Health Literature, LEA, Lower Extremity Amputation,  
43 MeSH, Medical Subject Headings, NHS, National Health Service, PVD, Peripheral Vascular Disease,  
44 RCT, Randomised Controlled Trial, SIGN, Scottish Intercollegiate Guidelines Network, UCC,  
45 University College Cork, UK, United Kingdom  
46  
47

### 48 **REFERENCES**

- 49 1. Lam DW, LeRoith D. The worldwide diabetes epidemic. *Current Opinion in Endocrinology,*  
50 *Diabetes and Obesity* 2012;**19**(2):93-96 10.1097/MED.0b013e328350583a  
51 2. Moxey P, Gogalniceanu P, Hinchliffe R, et al. Lower extremity amputations—a review of global  
52 variability in incidence. *Diabetic Medicine* 2011;**28**(10):1144–53  
53 3. Turner R, Holman R, Stratton I, et al. Tight blood pressure control and risk of macrovascular and  
54 microvascular complications in type 2 diabetes: UKPDS 38. *BMJ* 1998;**317**(7160):703-13  
55

4. Intensive blood-glucose control with sulphonylureas or insulin compared with conventional treatment and risk of complications in patients with type 2 diabetes (UKPDS 33). UK Prospective Diabetes Study (UKPDS) Group. *Lancet* 1998;**352**(9131):837-53 doi: 10.1016/S0140673698070196 [pii][published Online First: Epub Date] .
5. Boulton AJ. Lowering the risk of neuropathy, foot ulcers and amputations. *Diabet Med* 1998;**15** Suppl 4:S57-9 doi: 10.1002/(sici)1096-9136(1998120)15:4+<s57::aid-dia741>3.0.co;2-d[published Online First: Epub Date] .
6. Apelqvist J, Larsson J. What is the most effective way to reduce incidence of amputation in the diabetic foot? *Diabetes/metabolism research and reviews* 2000;**16**(S1):S75-S83
7. Singh N, Armstrong DG, Lipsky BA. Preventing foot ulcers in patients with diabetes. *JAMA* 2005;**293**(2):217-28 doi: 10.1001/jama.293.2.217[published Online First: Epub Date] .
8. IDF. Position Statement - the Diabetic Foot. Secondary Position Statement - the Diabetic Foot. <http://www.idf.org/position-statement-diabetic-foot>.
9. Adler A, Erqou S, Lima TAS, Robinson AHN. Association between glycated haemoglobin and the risk of lower extremity amputation in patients with diabetes mellitus—review and meta-analysis. *Diabetologia* 2010;**53**(5):840-49
10. Adler AI, Boyko EJ, Ahroni JH, Smith DG. Lower-extremity amputation in diabetes. The independent effects of peripheral vascular disease, sensory neuropathy, and foot ulcers. *Diabetes Care* 1999;**22**(7):1029
11. Pecoraro R, Reiber G, Burgess E. Pathways to diabetic limb amputation. Basis for prevention. *Diabetes Care* 1990;**13**(5):513
12. Agardh E, Allebeck P, Hallqvist J, Moradi T, Sidorchuk A. Type 2 diabetes incidence and socio-economic position: a systematic review and meta-analysis. *International Journal of Epidemiology* 2011 doi: 10.1093/ije/dyr029[published Online First: Epub Date] .
13. Boulton AJM, Armstrong DG, Albert SF, et al. Comprehensive Foot Examination and Risk Assessment. *Diabetes Care* 2008;**31**(8):1679-85 doi: 10.2337/dc08-9021[published Online First: Epub Date] .
14. SIGN. Management of diabetes. A national clinical guideline March 2010. <http://www.sign.ac.uk/pdf/sign116.pdf>.
15. NHS. Careers in Detail. Secondary Careers in Detail. <http://www.nhs.uk/nhs-careers/nhs.uk/details/Default.aspx?id=280>.
16. Dorresteijn Johannes AN, Kriegsman Didi MW, Valk Gerlof D. Complex interventions for preventing diabetic foot ulceration. *Cochrane Database of Systematic Reviews* 2010; (1). <http://www.mrw.interscience.wiley.com/cochrane/clsysrev/articles/CD007610/frame.html>.
17. Dorresteijn Johannes AN KDM, Assendelft Willem JJ, Valk Gerlof D. Patient education for preventing diabetic foot ulceration. *Cochrane Database of Systematic Reviews Updated*; John Wiley & Sons, Ltd. <http://onlinelibrary.wiley.com/doi/10.1002/14651858.CD001488.pub4/abstract> (accessed 2012).
18. Downs SH, Black N. The feasibility of creating a checklist for the assessment of the methodological quality both of randomised and non-randomised studies of health care interventions. *Journal of Epidemiology and Community Health* 1998;**52**(6):377-84 doi: 10.1136/jech.52.6.377[published Online First: Epub Date] .
19. Higgins JPT, Thompson SG, Deeks JJ, Altman DG. Measuring inconsistency in meta-analyses. *BMJ* 2003;**327**(7414):557-60 doi: 10.1136/bmj.327.7414.557[published Online First: Epub Date] .
20. Liberati A, Altman DG, Tetzlaff J, et al. The PRISMA statement for reporting systematic reviews and meta-analyses of studies that evaluate healthcare interventions: explanation and elaboration. *BMJ* 2009;**339** doi: 10.1136/bmj.b2700[published Online First: Epub Date] .
21. Lavery LA, Hunt NA, LaFontaine J, Baxter CL, Ndip A, Boulton AJM. Diabetic Foot Prevention. *Diabetes Care* 2010;**33**(7):1460-62 doi: 10.2337/dc10-0310[published Online First: Epub Date] .

- 1  
2  
3  
4  
5  
6  
7  
8  
9  
10  
11  
12  
13  
14  
15  
16  
17  
18  
19  
20  
21  
22  
23  
24  
25  
26  
27  
28  
29  
30  
31  
32  
33  
34  
35  
36  
37  
38  
39  
40  
41  
42  
43  
44  
45  
46  
47  
48  
49  
50  
51  
52  
53  
54  
55  
56  
57  
58  
59  
60
22. Ronnema T, Hamalainen H, Toikka T, Liukkonen I. Evaluation of the impact of podiatrist care in the primary prevention of foot problems in diabetic subjects. *Diabetes Care* 1997;**20**(12):1833-7
  23. Plank J, Haas W, Rakovac I, et al. Evaluation of the Impact of Chiropodist Care in the Secondary Prevention of Foot Ulcerations in Diabetic Subjects. *Diabetes Care* 2003;**26**(6):1691-95 doi: 10.2337/diacare.26.6.1691[published Online First: Epub Date]].
  24. Sowell RD, Mangel WB, Kilczewski CJ, Normington JM. Effect of podiatric medical care on rates of lower-extremity amputation in a Medicare population. *J Am Podiatr Med Assoc* 1999;**89**(6):312-7
  25. Pereira TV, Patsopoulos NA, Salanti G, Ioannidis JPA. Critical interpretation of Cochran's Q test depends on power and prior assumptions about heterogeneity. *Research Synthesis Methods* 2010;**1**(2):149-61 doi: 10.1002/jrsm.13[published Online First: Epub Date]].
  26. Fylkesnes K. Determinants of Health Care Utilization — Visits and Referrals. *Scandinavian Journal of Public Health* 1993;**21**(1):40-50 doi: 10.1177/140349489302100107[published Online First: Epub Date]].
  27. Adamson J, Ben-Shlomo Y, Chaturvedi N, Donovan J. Ethnicity, socio-economic position and gender—do they affect reported health—care seeking behaviour? *Social Science & Medicine* 2003;**57**(5):895-904 doi: 10.1016/s0277-9536(02)00458-6[published Online First: Epub Date]].
  28. Jackson LA, Jackson ML, Nelson JC, Neuzil KM, Weiss NS. Evidence of bias in estimates of influenza vaccine effectiveness in seniors. *International Journal of Epidemiology* 2006;**35**(2):337-44 doi: 10.1093/ije/dyi274[published Online First: Epub Date]].
  29. Leese GP, Schofield CJ. Amputations in diabetes: A changing scene. *Practical Diabetes International* 2008;**25**(8):297-99
  30. El Sakka K, Fassiadis N, Gambhir RP, et al. An integrated care pathway to save the critically ischaemic diabetic foot. *Int J Clin Pract* 2006;**60**(6):667-9 doi: 10.1111/j.1368-5031.2006.00953.x[published Online First: Epub Date]].
  31. Dargis V, Pantelejeva O, Jonushaite A, Vileikyte L, Boulton AJ. Benefits of a multidisciplinary approach in the management of recurrent diabetic foot ulceration in Lithuania: a prospective study. *Diabetes Care* 1999;**22**(9):1428-31
  32. Van Gils CC, Wheeler LA, Mellstrom M, Brinton EA, Mason S, Wheeler CG. Amputation prevention by vascular surgery and podiatry collaboration in high-risk diabetic and nondiabetic patients. The Operation Desert Foot experience. *Diabetes Care* 1999;**22**(5):678-83
  33. Meltzer DD, Pels S, Payne WG, et al. Decreasing amputation rates in patients with diabetes mellitus. An outcome study. *Journal of the American Podiatric Medical Association* 2002;**92**(8):425-28
  34. Larsson J, Apelqvist J, Agardh CD, Stenstrom A. Decreasing incidence of major amputation in diabetic patients: a consequence of a multidisciplinary foot care team approach? *Diabet Med* 1995;**12**(9):770-6
  35. Frykberg RG. Team approach toward lower extremity amputation prevention in diabetes. *J Am Podiatr Med Assoc* 1997;**87**(7):305-12
  36. Patout CA, Birke JA, Horswell R, Williams D, Cerise FP. Effectiveness of a comprehensive diabetes lower-extremity amputation prevention program in a predominantly low-income African-American population. *Diabetes Care* 2000;**23**(9):1339-42 doi: 10.2337/diacare.23.9.1339[published Online First: Epub Date]].
  37. Lipscombe J, Jassal SV, Bailey S, Bargman JM, Vas S, Oreopoulos DG. Chiropody may prevent amputations in diabetic patients on peritoneal dialysis. *Perit Dial Int* 2003;**23**(3):255-9
  38. Sloan FA, Feinglos MN, Grossman DS. Receipt of Care and Reduction of Lower Extremity Amputations in a Nationally Representative Sample of U.S. Elderly. *Health Services Research*

2010;45(6p1):1740-62 doi: 10.1111/j.1475-6773.2010.01157.x[published Online First: Epub Date]].

### Table legends

Table 1 Characteristics of Included Studies

Table 2 Quality Assessment of Included RCTs

Table 3 Quality Assessment of Included Cohort Studies

Table 4 Results of Included Studies

### Appendices legends

Appendix 1 Diabetic foot risk stratification and triage

Appendix 2 Search Strategy for PUBMED (1966 – Sept 25<sup>th</sup> 2011)

Appendix 3 Search Strategy for CINAHL (1981 – Sept 25<sup>th</sup> 2011)

Appendix 4 Search Strategy for EMBASE (1974 – Sept 25<sup>th</sup> 2011)

Appendix 5 Search Strategy for Cochrane (1993 – Sept 25<sup>th</sup> 2011)

Appendix 6 Table of Excluded Studies

## TABLES

Table 1 Characteristics of Included Studies

| Study (Author, Country, Year)       | Type of study | Participants                                                               | Interventions                                                                                                                 | Source of data used in study | Length of follow-up                                               | Baseline risk as per diabetic foot risk stratification [14] | Outcomes                                                                                          |
|-------------------------------------|---------------|----------------------------------------------------------------------------|-------------------------------------------------------------------------------------------------------------------------------|------------------------------|-------------------------------------------------------------------|-------------------------------------------------------------|---------------------------------------------------------------------------------------------------|
| Ronnemaa, Finland, 1997[22]<br>[16] | RCT           | 530 patients with diabetes randomised<br>Intervention: 267<br>Control: 263 | Intervention: 45 minutes individual patient education<br>Podiatric care visits as necessary<br>Control: Written information   | Clinical report forms        | 1 year and 7 years                                                | Low                                                         | Primary:<br>Patient Knowledge about foot care<br>Secondary:<br>Ulcer incidence<br>Amputation rate |
| Plank, Austria, 2003[23]            | RCT           | 91 patients with diabetes randomised<br>Intervention: 47<br>Control: 44    | Intervention: Chiropodist visit at least once a month<br>Control: chiropodist treatment not specifically recommended          | Clinical report forms        | 386 days (368-424, 25 <sup>th</sup> -75 <sup>th</sup> percentile) | High (healed foot ulcers)                                   | Primary:<br>recurrence rate of ulcers<br>Secondary:<br>Amputation rate<br>Death                   |
| Sowell, USA, 1999[24]               | Cohort        | 255,256 with diabetes or PVD or gangrene followed over time                | Intervention: Podiatric Medical care – receipt of any M0101 services<br>Comparison: Did not receive podiatry (M0101) services | Medicare claims database     | 1 year                                                            | Unknown                                                     | Number of Amputations                                                                             |

12



1  
2  
3  
4  
5  
6  
7  
8  
9  
10  
11  
12  
13  
14  
15  
16  
17  
18  
19  
20  
21  
22  
23  
24  
25  
26  
27  
28  
29  
30  
31  
32  
33  
34  
35  
36  
37  
38  
39  
40  
41  
42  
43  
44  
45  
46  
47  
48  
49

|                              |        |                                                                                                                                                            |                                                                                                                                                                 |                                          |           |                                                                          |                                    |
|------------------------------|--------|------------------------------------------------------------------------------------------------------------------------------------------------------------|-----------------------------------------------------------------------------------------------------------------------------------------------------------------|------------------------------------------|-----------|--------------------------------------------------------------------------|------------------------------------|
| Lipscombe, Canada, 2003 [37] | Cohort | 132 patients with diabetes on PD (Peritoneal Dialysis)                                                                                                     | Intervention: Assessment, education and footcare by chiropody                                                                                                   | Medical charts                           | 3 years   | High                                                                     | <u>Number of Amputations</u>       |
| Lavery, USA, 2010[21]        | Cohort | 300 high-risk patients with diabetes<br>150 with an ulcer history<br>150 on dialysis followed over time                                                    | Intervention: Podiatry services - number of visits to podiatrist for prevention, ulcer treatment of other pathology                                             | Claims data & Electronic Medical Records | 30 months | High (history of foot ulcer)                                             | Amputation rate<br>Ulcer incidence |
| Sloan, UK, 2010[38]          | Cohort | 189,598 patients with diabetes followed over time<br>Participants grouped into different stages (1-4) of disease depending on severity of symptoms & signs | Intervention: Care provided by podiatrist<br>Comparison: Care provided by 'other health professional' – GP/Internist/Endocrinologist/Nurse /Physician Assistant | Medicare claims database                 | 6 years   | Stage 1: Moderate<br>Stage 2: High Stage<br>3: Active<br>Stage 4: Active | Amputation rate                    |

Table 2 Quality Assessment of Included RCTs

| Study (Author, Country, Year) | Type of study | Base Population                                                                                                       | Randomisation                                                                                                          | Blinding                                                                                             | Confounding                            | Losses to follow-up                                                                                           | Analysis                                   |
|-------------------------------|---------------|-----------------------------------------------------------------------------------------------------------------------|------------------------------------------------------------------------------------------------------------------------|------------------------------------------------------------------------------------------------------|----------------------------------------|---------------------------------------------------------------------------------------------------------------|--------------------------------------------|
| Ronnemaa, Finland, 1997 [22]  | RCT           | Community based care in Finland, receiving anti-diabetic drug treatment from the national drug reimbursement register | Randomisation performed separately for men/women and patients </> 20 years. Method of randomisation not described      | Outcome assessor blinded to baseline characteristics but no further information on blinding provided | Baseline Characteristics not described | Follow-up completed by 63% of patients in intervention group and 62% patients in control group at seven years | No intention to treat analysis undertaken  |
| Plank, Austria, 2003 [23]     | RCT           | All in routine outpatient care at hospital diabetic foot clinic in Austria                                            | Subjects were assigned a patient number in ascending order and randomly allocated to the intervention or control group | Allocation concealment ensured                                                                       | Similar Baseline Characteristics       | All patients followed up                                                                                      | Intention to treat & per protocol analysis |

1  
2  
3  
4  
5  
6  
7  
8  
9  
10  
11  
12  
13  
14  
15  
16  
17  
18  
19  
20  
21  
22  
23  
24  
25  
26  
27  
28  
29  
30  
31  
32  
33  
34  
35  
36  
37  
38  
39  
40  
41  
42  
43  
44  
45  
46  
47  
48  
49

Table 3 Quality Assessment of Included Cohort Studies

| Study (Author, Country, Year) | Type of study | Base Population                                                                                              | Confounding                                                              | Losses to follow-up                                                                                                       | Analysis                                                                                                |
|-------------------------------|---------------|--------------------------------------------------------------------------------------------------------------|--------------------------------------------------------------------------|---------------------------------------------------------------------------------------------------------------------------|---------------------------------------------------------------------------------------------------------|
| Sowell, USA, 1999 [24]        | Cohort        | All Medicare population at risk for lower extremity amputation in 1993-1994                                  | Not addressed – only looked at 1 variable – acknowledged as a limitation | No losses to follow-up                                                                                                    | Amputation incidence rates with & without exposure to podiatry                                          |
| Lipscombe, Canada, 2003 [37]  | Cohort        | Patients in Peritoneal Dialysis program at University Health Network, between January 1997 and December 1999 | Data on confounding variables collected                                  | No losses to follow-up                                                                                                    | Descriptive Stats                                                                                       |
| Lavery, USA, 2010 [21]        | Cohort        | Patients with diabetes attending Scott and White Health Plan, Texas, USA                                     | Data on confounding variables collected                                  | 150 consecutive patients with at least 30 months follow-up from the time of diagnosis recruited so no losses to follow-up | Descriptive Stats                                                                                       |
| Sloan, UK, 2010 [38]          | Cohort        | All individuals with a DM-related LEC diagnosis between 1994 and 2001                                        | Data on confounding variables collected                                  | No losses to follow-up                                                                                                    | Hazard Ratios adjusted for Medicare expenditures from care received from non-study health professionals |

Table 4 Results of Included Studies

| Study (Author, Country, Year)     | Type of study | Primary Outcome                                                                                                                                                                                                         | Baseline risk as per diabetic foot risk stratification [14]              | Relative risk of amputation with contact with a podiatrist compared to no contact with a podiatrist  |
|-----------------------------------|---------------|-------------------------------------------------------------------------------------------------------------------------------------------------------------------------------------------------------------------------|--------------------------------------------------------------------------|------------------------------------------------------------------------------------------------------|
| Ronnemaa, Finland, 1997 [22],[16] | RCT           | <u>Diabetes-related Amputation:</u><br>One year follow-up: Intervention: 0 Control: 0<br>Seven years follow-up: Intervention: 1 Control: 0                                                                              | Low                                                                      | 2.96                                                                                                 |
| Plank, Austria, 2003 [23]         | RCT           | <u>Diabetes-related Amputation:</u><br>One year follow-up: Intervention: 2 Control: 1                                                                                                                                   | High (healed foot ulcers)                                                | 0.92                                                                                                 |
| Sowell, USA, 1999 [24]            | Cohort        | <u>Amputation related to diabetes/gangrene/PVD</u><br>One year follow-up: Intervention: 20<br>Control: 130                                                                                                              | Unknown                                                                  | 0.25                                                                                                 |
| Lipscombe, Canada, 2003 [37]      | Cohort        | <u>Diabetes-related Amputation:</u><br>Amputation during any of the 3 years of the study: Intervention: 11 Control: 4                                                                                                   | High                                                                     | 2.16                                                                                                 |
| Lavery, USA, 2010 [21]            | Cohort        | <u>Diabetes-related Amputation:</u><br>Actual number of amputations not outlined<br><u>Amputation Incidence Density:</u><br>58.7 in Dialysis Group per 1,000 person years<br>13.1 in Ulcer Group per 1,000 person years | High (history of foot ulcer)                                             | Unknown                                                                                              |
| Sloan, UK, 2010 [38]              | Cohort        | <u>Diabetes-related Amputation:</u><br>Six year follow-up: actual number of amputations not outlined                                                                                                                    | Stage 1: Moderate<br>Stage 2: High<br>Stage 3: Active<br>Stage 4: Active | Stage 1 disease : 2.20<br>Stage 2 disease : 0.85<br>Stage 3 disease : 0.44<br>Stage 4 disease : 0.36 |



# PRISMA 2009 Checklist

| Section/topic                      | #  | Checklist item                                                                                                                                                                                                                                                                                              | Reported on page #    |
|------------------------------------|----|-------------------------------------------------------------------------------------------------------------------------------------------------------------------------------------------------------------------------------------------------------------------------------------------------------------|-----------------------|
| <b>TITLE</b>                       |    |                                                                                                                                                                                                                                                                                                             |                       |
| Title                              | 1  | Identify the report as a systematic review, meta-analysis, or both.                                                                                                                                                                                                                                         | 1                     |
| <b>ABSTRACT</b>                    |    |                                                                                                                                                                                                                                                                                                             |                       |
| Structured summary                 | 2  | Provide a structured summary including, as applicable: background; objectives; data sources; study eligibility criteria, participants, and interventions; study appraisal and synthesis methods; results; limitations; conclusions and implications of key findings; systematic review registration number. | 2-3                   |
| <b>INTRODUCTION</b>                |    |                                                                                                                                                                                                                                                                                                             |                       |
| Rationale                          | 3  | Describe the rationale for the review in the context of what is already known.                                                                                                                                                                                                                              | 4                     |
| Objectives                         | 4  | Provide an explicit statement of questions being addressed with reference to participants, interventions, comparisons, outcomes, and study design (PICOS).                                                                                                                                                  | 4                     |
| <b>METHODS</b>                     |    |                                                                                                                                                                                                                                                                                                             |                       |
| Protocol and registration          | 5  | Indicate if a review protocol exists, if and where it can be accessed (e.g., Web address), and, if available, provide registration information including registration number.                                                                                                                               | 4, Supplementary File |
| Eligibility criteria               | 6  | Specify study characteristics (e.g., PICOS, length of follow-up) and report characteristics (e.g., years considered, language, publication status) used as criteria for eligibility, giving rationale.                                                                                                      | 4-5                   |
| Information sources                | 7  | Describe all information sources (e.g., databases with dates of coverage, contact with study authors to identify additional studies) in the search and date last searched.                                                                                                                                  | 4                     |
| Search                             | 8  | Present full electronic search strategy for at least one database, including any limits used, such that it could be repeated.                                                                                                                                                                               | Appendices 2-5        |
| Study selection                    | 9  | State the process for selecting studies (i.e., screening, eligibility, included in systematic review, and, if applicable, included in the meta-analysis).                                                                                                                                                   | 5                     |
| Data collection process            | 10 | Describe method of data extraction from reports (e.g., piloted forms, independently, in duplicate) and any processes for obtaining and confirming data from investigators.                                                                                                                                  | 5                     |
| Data items                         | 11 | List and define all variables for which data were sought (e.g., PICOS, funding sources) and any assumptions and simplifications made.                                                                                                                                                                       | 5                     |
| Risk of bias in individual studies | 12 | Describe methods used for assessing risk of bias of individual studies (including specification of whether this was done at the study or outcome level), and how this information is to be used in any data synthesis.                                                                                      | 5                     |
| Summary measures                   | 13 | State the principal summary measures (e.g., risk ratio, difference in means).                                                                                                                                                                                                                               | 5                     |
| Synthesis of results               | 14 | Describe the methods of handling data and combining results of studies, if done, including measures of consistency (e.g., $I^2$ ) for each meta-analysis.                                                                                                                                                   | 5                     |

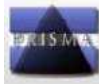

# PRISMA 2009 Checklist

1  
2  
3  
4  
5  
6  
7  
8  
9  
10  
11  
12  
13  
14  
15  
16  
17  
18  
19  
20  
21  
22  
23  
24  
25  
26  
27  
28  
29  
30  
31  
32  
33  
34  
35  
36  
37  
38  
39  
40  
41  
42  
43  
44  
45  
46  
47  
48  
49

| Section/topic                 | #  | Checklist item                                                                                                                                                                                           | Reported on page # |
|-------------------------------|----|----------------------------------------------------------------------------------------------------------------------------------------------------------------------------------------------------------|--------------------|
| Risk of bias across studies   | 15 | Specify any assessment of risk of bias that may affect the cumulative evidence (e.g., publication bias, selective reporting within studies).                                                             | 5                  |
| Additional analyses           | 16 | Describe methods of additional analyses (e.g., sensitivity or subgroup analyses, meta-regression), if done, indicating which were pre-specified.                                                         | 7                  |
| <b>RESULTS</b>                |    |                                                                                                                                                                                                          |                    |
| Study selection               | 17 | Give numbers of studies screened, assessed for eligibility, and included in the review, with reasons for exclusions at each stage, ideally with a flow diagram.                                          | 5<br>Figure 1      |
| Study characteristics         | 18 | For each study, present characteristics for which data were extracted (e.g., study size, PICOS, follow-up period) and provide the citations.                                                             | 13-14              |
| Risk of bias within studies   | 19 | Present data on risk of bias of each study and, if available, any outcome level assessment (see item 12).                                                                                                | 15-16              |
| Results of individual studies | 20 | For all outcomes considered (benefits or harms), present, for each study: (a) simple summary data for each intervention group (b) effect estimates and confidence intervals, ideally with a forest plot. | 17<br>Figure 2     |
| Synthesis of results          | 21 | Present results of each meta-analysis done, including confidence intervals and measures of consistency.                                                                                                  | 6                  |
| Risk of bias across studies   | 22 | Present results of any assessment of risk of bias across studies (see Item 15).                                                                                                                          | 6<br>Figure 3      |
| Additional analysis           | 23 | Give results of additional analyses, if done (e.g., sensitivity or subgroup analyses, meta-regression [see Item 16]).                                                                                    | n/a                |
| <b>DISCUSSION</b>             |    |                                                                                                                                                                                                          |                    |
| Summary of evidence           | 24 | Summarize the main findings including the strength of evidence for each main outcome; consider their relevance to key groups (e.g., healthcare providers, users, and policy makers).                     | 6                  |
| Limitations                   | 25 | Discuss limitations at study and outcome level (e.g., risk of bias), and at review-level (e.g., incomplete retrieval of identified research, reporting bias).                                            | 6                  |
| Conclusions                   | 26 | Provide a general interpretation of the results in the context of other evidence, and implications for future research.                                                                                  | 7-8                |
| <b>FUNDING</b>                |    |                                                                                                                                                                                                          |                    |
| Funding                       | 27 | Describe sources of funding for the systematic review and other support (e.g., supply of data); role of funders for the systematic review.                                                               | 8                  |

From: Moher D, Liberati A, Tetzlaff J, Altman DG, The PRISMA Group (2009). Preferred Reporting Items for Systematic Reviews and Meta-Analyses: The PRISMA Statement. PLoS Med 6(6): e1000097. doi:10.1371/journal.pmed1000097

For more information, visit: [www.prisma-statement.org](http://www.prisma-statement.org).

For peer review only - <http://bmjopen.bmj.com/site/about/guidelines.xhtml>

1  
2  
3  
4  
5  
6  
7  
8  
9  
10  
11  
12  
13  
14  
15  
16  
17  
18  
19  
20  
21  
22  
23  
24  
25  
26  
27  
28  
29  
30  
31  
32  
33  
34  
35  
36  
37  
38  
39  
40  
41  
42  
43  
44  
45  
46  
47

Appendices

Appendix 1 Diabetic foot risk stratification and triage

# DIABETIC FOOT RISK STRATIFICATION AND TRIAGE

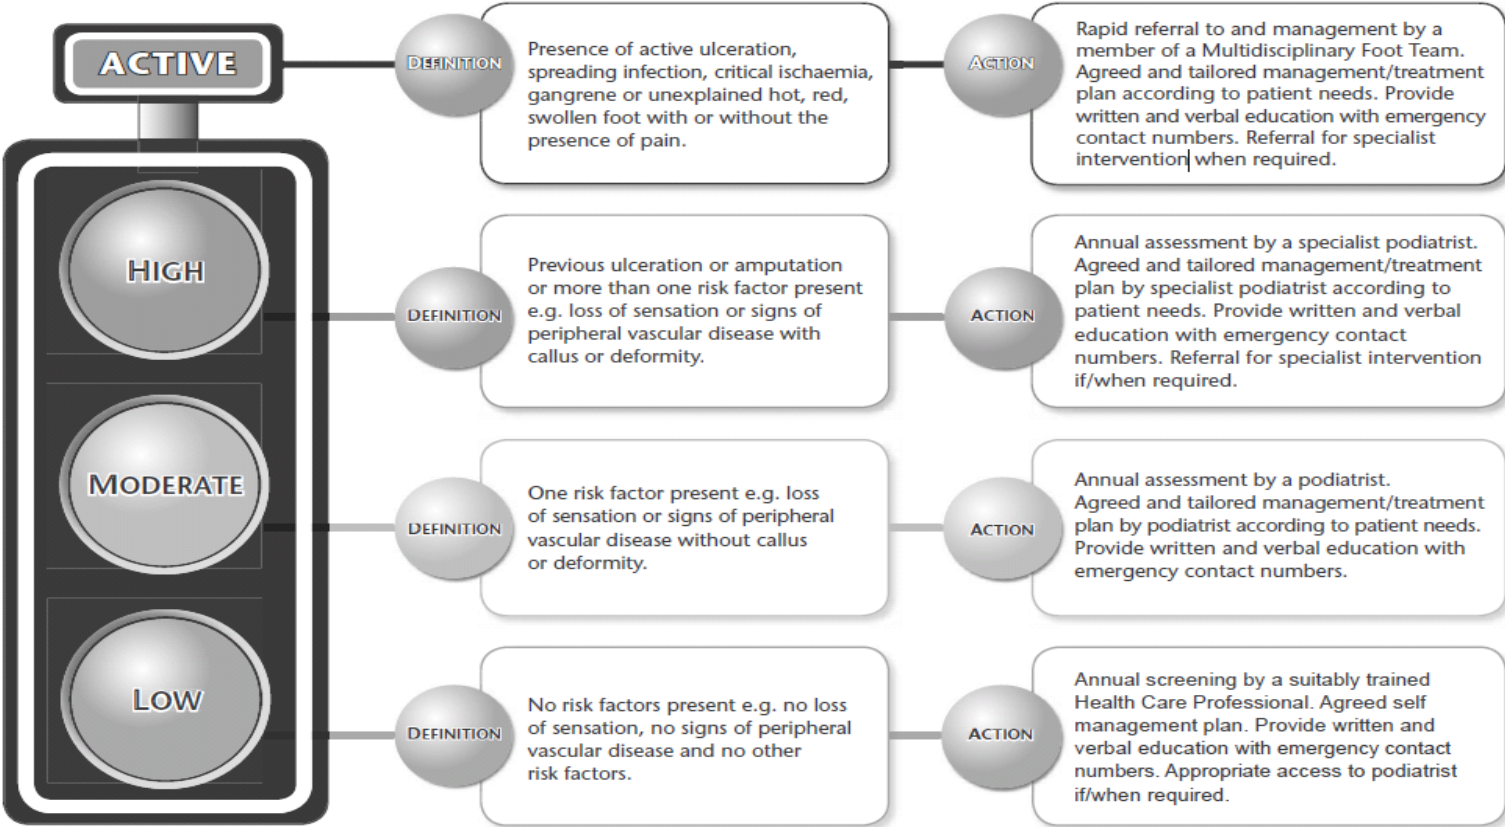

Produced by the Scottish Diabetes Group - Foot Action Group

These risk categories relate to the use of the SCI-DC foot risk stratification tool

1  
2  
3 **Appendix 2 Search Strategy for PUBMED (1966 – Sept 25<sup>th</sup> 2011)**  
4

- 5 1. Diabetes mellitus (MeSH)  
6  
7 2. Diabet\*  
8  
9 3. 1 or 2  
10  
11 4. Amputation (MeSH)  
12  
13 5. Amput\*  
14  
15 6. 4 or 5  
16  
17 7. Podiatry (MeSH)  
18  
19 8. Podiatr\*  
20  
21 9. 7 or 8  
22  
23 10. Case-control study (MeSH)  
24  
25 11. Case-control\* (free text)  
26  
27 12. Cohort studies (MeSH)  
28  
29 13. Cohort\* (free text)  
30  
31 14. Retrospective Studies (MeSH)  
32  
33 15. Prospective Studies (MeSH)  
34  
35 16. Journal Article (Publication type)  
36  
37 17. Clinical Trial (Publication Type)  
38  
39 18. Randomized Controlled Trial (Publication Type)  
40  
41 19. 10 or 11 or 12 or 13 or 14 or 14 or 16 or 17 or 18  
42  
43 20. 3 and 6 and 9 and 19  
44  
45  
46  
47  
48  
49

50  
51 Results: 184  
52  
53  
54  
55  
56  
57  
58  
59  
60



Appendix 3 Search Strategy for CINAHL (1981 – Sept 25<sup>th</sup> 2011)

1. (MH "Diabetes Mellitus+") OR (MH "Diabetes Mellitus, Insulin-Dependent") OR (MH "Diabetes Mellitus, Non-Insulin-Dependent")
2. Diabet\*
3. 1 or 2
4. (MH "Amputation+") OR (MH "Above-Knee Amputation") OR (MH "Amputation Stumps") OR (MH "Amputation Care (Iowa NIC)")
5. Amput\*
6. 4 or 5
7. Podiatric Assessment") OR (MH "Education, Podiatry") OR (MH "Surgery, Podiatric+") OR (MH "Podiatric Care")
8. Podiatr\*
9. 7 or 8
10. (MH "Case Control Studies+")
11. Case-control\* (free text)
12. Cohort studies (MeSH)
13. Cohort\* (free text)
14. (MH "Retrospective Panel Studies") OR (MH "Retrospective Design")
15. (MH "Prospective Studies") OR (MH "Concurrent Prospective Studies") OR (MH "Nonconcurrent Prospective Studies")
16. (MH "Electronic Publications+") OR (MH "Electronic Journals") OR (MH "Publication Formats+")
17. Article (free text)
18. (MH "Clinical Trials+")
19. (MH "Randomized Controlled Trials")
20. 10 or 11 or 12 or 13 or 14 or 15 or 16 or 17 or 18 or 19
21. 3 and 6 and 9 and 20

Results: 43

1  
2  
3 **Appendix 4 Search Strategy for EMBASE (1974 – Sept 25<sup>th</sup> 2011)**  
4

- 5 1. 'diabetes mellitus'/exp  
6  
7 2. diabet\*  
8  
9 3. 1 or 2  
10  
11 4. 'amputation'/exp  
12  
13 5. amput\*  
14  
15 6. 4 or 5  
16  
17 7. 'podiatry'/exp  
18  
19 8. podiatr\*  
20  
21 9. 7 or 8  
22  
23 10. 'case control study'/exp – (mesh/emtree)  
24  
25 11. 'case control study'/exp OR 'case control study' – (case control\*)  
26  
27 12. 'cohort study'/exp – (mesh/emtree)  
28  
29 13. Cohort\*  
30  
31 14. 'retrospective study'/exp  
32  
33 15. 'prospective study'/exp  
34  
35 16. 'article'/exp  
36  
37 17. 'clinical trial'/exp  
38  
39 18. 'randomized controlled trial'/exp  
40  
41 19. 10 or 11 or 12 or 13 or 14 or 15 or 16 or 17 or 18  
42  
43 20. 3 and 6 and 9 and 19  
44  
45  
46  
47  
48  
49

50  
51 Results: 246  
52  
53  
54  
55  
56  
57  
58  
59  
60

Appendix 5 Search Strategy for Cochrane (1993 – Sept 25<sup>th</sup> 2011)

1. MeSH descriptor Diabetes Mellitus explode all trees in all MeSH products
2. Diabet\*
3. 1 or 2
4. [MeSH descriptor](#) Amputation [explode all trees](#)
5. [Amput\\*](#)
6. 4 or 5
7. [MeSH descriptor](#) Podiatry [explode all trees](#)
8. Podiatr\*
9. 7 or 8
10. MeSH descriptor Case-Control Studies explode all trees in all MeSH products
11. Case control stud\*
12. MeSH descriptor Cohort Studies explode all trees in all MeSH products
13. Cohort stud\*
14. MeSH descriptor Retrospective Studies explode all trees in all MeSH products
15. MeSH descriptor Prospective Studies explode all trees in all MeSH products
16. Article
17. Clinical Trial
18. Randomised Control Trial
19. 10 or 11 or 12 or 13 or 14 or 15 or 16 or 17 or 18
20. 3 and 6 and 9 and 19

Results: 25

13 Cochrane Reviews

2 Other Reviews

6 Clinical Trials

2 Technology Assessments

2 Economic Evaluations

1 Cochrane Group

Appendix 6 Table of Excluded Studies

| Study (Author, Country, Year) | Exclusion criteria                    | Details                                                                                                         |
|-------------------------------|---------------------------------------|-----------------------------------------------------------------------------------------------------------------|
| Driver, 2010[39]              | Intervention                          | Podiatric lead limb preservation team - No data on contact with a podiatrist as the intervention available      |
| Ellis, 2010[40]               | Design / Outcome                      | Audit / Diabetic Foot Complication                                                                              |
| Zayed, 2009[41]               | Intervention                          | Podiatry as part of Multidisciplinary team - No data on contact with a podiatrist as the intervention available |
| Snyder, 2006[42]              | Design<br>No reporting of association | Chart review/case series,<br>Intervention on subset of patients, comparison group not available for this subset |
| Robbins, 2006[43]             | Intervention                          | Podiatry as part of Multidisciplinary team - No data on contact with a podiatrist as the intervention available |
| El Sakka 2006[30]             | Intervention                          | Podiatry as part of Multidisciplinary team - No data on contact with a podiatrist as the intervention available |
| Schraer, 2004[44]             | Intervention                          | Program                                                                                                         |
| Dargis, 1999[31]              | Intervention                          | Podiatry as part of Multidisciplinary team - No data on contact with a podiatrist as the intervention available |
| Van Gils, 1999[32]            | Intervention                          | Podiatry as part of Multidisciplinary team - No data on contact with a podiatrist as the intervention available |
| Del Aguila, 1994[45]          | No report of association              | Number of podiatry visits in 12 months described - Unable to determine whom were not exposed to podiatry        |
| Malone, 1989[46]              | Intervention                          | Intervention involved education by podiatrists, not treatment                                                   |
| Crane, USA, 1999[47]          | Intervention                          | Podiatry-established critical pathway                                                                           |
| Carrington, UK, 2001[48]      | Intervention                          | Program including podiatry                                                                                      |

1  
2  
3  
4  
5  
6  
7  
8  
9  
10  
11  
12  
13  
14  
15  
16  
17  
18  
19  
20  
21  
22  
23  
24  
25  
26  
27  
28  
29  
30  
31  
32  
33  
34  
35  
36  
37  
38  
39  
40  
41  
42  
43  
44  
45  
46  
47

|                                |                                  |                                                                                                               |
|--------------------------------|----------------------------------|---------------------------------------------------------------------------------------------------------------|
| Hamalainen, Finland, 1998 [49] | Study described in another paper |                                                                                                               |
| McCabe, UK, 1998 [50]          | Intervention                     | Clinical foot screening programme, only subset of population seen by podiatrist, no comparison group involved |

For peer review only

# PROTOCOL FOR SYSTEMATIC REVIEW

---

---

## DOES CONTACT WITH A PODIATRIST PREVENT THE OCCURRENCE OF A LOWER EXTREMITY AMPUTATION IN PEOPLE WITH DIABETES? A SYSTEMATIC REVIEW AND META-ANALYSIS

---

### **Authors:**

Dr Claire M. Buckley

Professor Ivan J. Perry

Professor Colin P. Bradley

Dr Patricia M. Kearney

## BACKGROUND

Diabetes is associated with a significant risk of LEA (lower extremity amputation) [1]. LEA rates vary between communities, 46-9,600 per 10<sup>5</sup> people with diabetes, for many reasons [2]. A number of factors influence the occurrence of a LEA in patients with diabetes; including hypertension, obesity and hyperglycaemia [3-7]. In the foot, previous ulceration, infection and ischaemia are proven risk factors [8]. Nearly 85% of amputations begin as foot ulcers among persons with diabetes [9]. Protective factors include control of clinical parameters and screening to identify those patients at high risk [10]. Many LEAs are preventable [11]. Thus, the effects of clinical and socio-demographic risk factors on the occurrence of a lower extremity amputation have been well documented in patients with diabetes in previous studies [12] [13] [14]. However, the effect of patient contact with a podiatrist on the occurrence of LEA in patients with diabetes is less well explored.

In 1998, the ADA (American Diabetes Association) published a technical review and position statement on preventive foot care in people with diabetes, highlighting the importance of foot care in people with diabetes to prevent adverse outcomes [15 16]. An updated position statement by the ADA in 2003 stated that early recognition and management of independent risk factors for ulcers and amputations can prevent or delay the onset of adverse outcomes [17]. However, these statements did not specify the role of podiatry. In 2005, the Standards of Medical Care of Diabetes issued by the ADA advised that problems involving the feet, especially ulcers and wound care, may require care by a podiatrist [18]. And in 2008, a task force report by the Foot Care Interest Group of the ADA stated that all patients with diabetes should be assigned to a foot risk category. These categories were designed to direct referral and subsequent therapy by the speciality clinician or team [19]. This report did not outline the role of podiatry but panel members included podiatric medicine representatives, suggesting that podiatry does have a place in footcare of patients with diabetes. It is now being recognised across the globe that podiatry has a role in the management of the diabetic foot. Guidelines from Scotland, Europe outline a diabetic risk stratification and triage tool, highlighting which patients need podiatry referral [20] (Appendix 1).

The management of diabetes is a complex process involving many healthcare professionals, including podiatrists. Two previous Cochrane reviews by Dorrestiejn et al have looked at lower extremity amputation in patients with diabetes as an outcome [21 22]. In 2009, Dorrestiejn et al concluded that there is no high quality evidence evaluating complex interventions (complex intervention defined as an integrated care approach) and insufficient evidence of benefit in preventing diabetic foot ulceration [21]. The second Cochrane review in 2010 concluded that there is insufficient robust evidence that limited patient education alone is effective in achieving clinically relevant reductions in ulcer and amputation incidence [22]. Individual patient contact with a podiatrist was not examined as an intervention in either review. To the best of our knowledge, the effect of contact with a podiatrist on the occurrence of a LEA in patients with diabetes has not been previously examined in any systematic review.

This review will look at contact with a podiatrist as an intervention to prevent LEA in patients with diabetes. Randomised and non-randomised studies will be included.

## Objectives

To conduct a systematic review of international literature to determine if contact with a podiatrist has an effect on the occurrence of LEA in patients with diabetes.

## METHODS

### Criteria for considering studies for review

#### Types of study design

Randomised and non-randomised studies that allow analysis of the effect of patient contact with a podiatrist in preventing LEAs will be included.

#### Types of participants

People with type 1 or type 2 diabetes mellitus in any health care setting.

#### Types of interventions

Studies of patients with diabetes attending a podiatrist for treatment alone or for treatment and education to prevent the occurrence of LEA will be included. Comparison groups will be those that were not in contact with podiatrists or received written instructions only.

#### Types of outcome measures

Primary: LEA (first or repeat)

Secondary: N/A

**Table 1 Inclusion & Exclusion Criteria**

| Inclusion Criteria:                                                                                               | Exclusion Criteria:                                                          |
|-------------------------------------------------------------------------------------------------------------------|------------------------------------------------------------------------------|
| <ul style="list-style-type: none"> <li>Any time</li> </ul>                                                        | <ul style="list-style-type: none"> <li>Cross-sectional studies</li> </ul>    |
| <ul style="list-style-type: none"> <li>English language</li> </ul>                                                | <ul style="list-style-type: none"> <li>Review articles</li> </ul>            |
| <ul style="list-style-type: none"> <li>Any Country</li> </ul>                                                     | <ul style="list-style-type: none"> <li>Non-systematic reviews</li> </ul>     |
| <ul style="list-style-type: none"> <li>Any age</li> </ul>                                                         | <ul style="list-style-type: none"> <li>Chart reviews /Case series</li> </ul> |
| <ul style="list-style-type: none"> <li>Patients with a diagnosis of diabetes – either type 1 or type 2</li> </ul> |                                                                              |

### Search strategy for identification of studies

Published studies will be identified through searches of PUBMED, CINAHL, EMBASE (Excerpta Medica), and Cochrane databases. No time-limits will be implemented. Where a study is reported in more than one article, data will be extracted from the most relevant report. The key search terms will be 'podiatry', 'amputation' and 'diabetes'. (Figure 1)



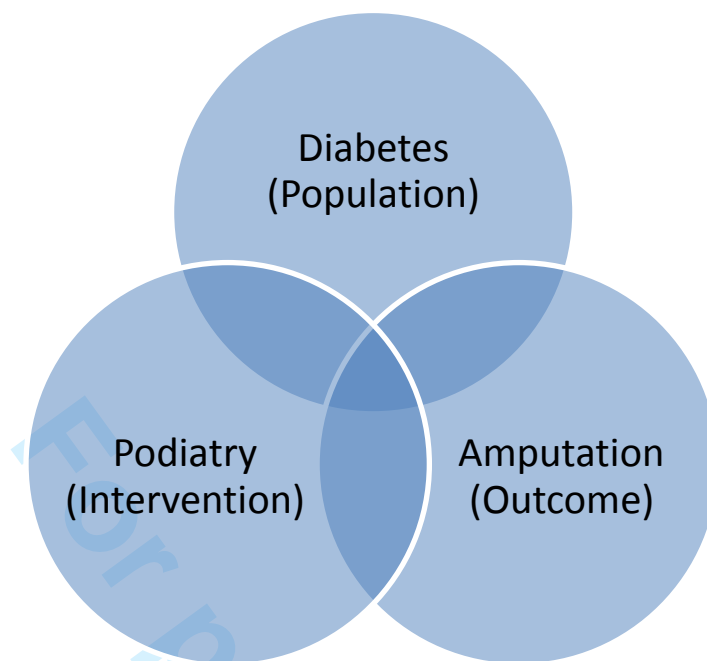

**Figure 1 Venn diagram of key terms for search strategy**

A comprehensive search strategy will be devised with the advice of the librarian. Key terms will be searched as MeSH (Medical Subject Heading) terms e.g. 'diabetes - MeSH term' and as free text with/without truncation as appropriate e.g. 'Diabet\*' (this symbol is used for identifying all words starting with Diabet, e.g. diabetes, diabetic etc.). The search will include case-control studies, cohort studies, retrospective and prospective studies, articles, clinical trials and RCTs. The strategy will be adapted as per database requirements.

In addition, hand searches will be conducted of the reference lists of all articles retrieved to identify other potentially eligible articles.

## **Methods - data collection and analysis**

### **Selection of studies**

Full copies of potentially eligible studies will be obtained and two review authors (CMB and PK) will decide independently on inclusion or exclusion (table 1). In the case of disagreement, consensus will be reached by discussion between four review authors (CMB, PK, CB and IJ).

### **Data extraction and management**

Data on eligible studies will be extracted and summarised using a pre-agreed data extraction summary form. This form will include study design, baseline characteristics of participants including number of participants, age, gender, ethnicity, type of diabetes, information on exposure, outcome measure (lower extremity amputation) and other relevant data. Risk of foot disease at baseline will be assessed using the Diabetic foot risk stratification and triage system from the SIGN (Scottish Intercollegiate Guidelines Network) guidelines (Appendix 1). If the data required for the review is missing from the published article, the authors will be contacted.

## Assessment of quality in included studies

A modified version of a checklist developed by Downs and Black for assessing the methodological quality of both randomised and non-randomised studies of health care interventions will be used to critically appraise the studies in this review [23].

## Assessment of heterogeneity

All eligible studies will be included in the data analysis. If data are too scarce or the quality of the studies is inadequate or results are too varied to present in numerical form, the authors will perform a narrative qualitative summary. If appropriate, meta-analysis will be attempted to pool outcome data. Either a fixed or random effects model will be used depending on the heterogeneity between studies. The most suitable model will be chosen after assessing the  $I^2$  statistic for heterogeneity.

## Pilot Results

Preliminary searches of the electronic databases have yielded approximately 500 titles & abstracts for initial screening.

## REFERENCES

1. Vamos EP, Bottle A, Edmonds ME, Valabhji J, Majeed A, Millett C. Changes in the Incidence of Lower Extremity Amputations in Individuals With and Without Diabetes in England Between 2004 and 2008. *Diabetes Care* 2010;**33**(12):2592-97 doi: 10.2337/dc10-0989[published Online First: Epub Date].
2. Moxey P, Gogalniceanu P, Hinchliffe R, et al. Lower extremity amputations—a review of global variability in incidence. *Diabetic Medicine* 2011;**28**(10):1144–53
3. Turner R, Holman R, Stratton I, et al. Tight blood pressure control and risk of macrovascular and microvascular complications in type 2 diabetes: UKPDS 38. *BMJ* 1998;**317**(7160):703-13
4. Intensive blood-glucose control with sulphonylureas or insulin compared with conventional treatment and risk of complications in patients with type 2 diabetes (UKPDS 33). UK Prospective Diabetes Study (UKPDS) Group. *Lancet* 1998;**352**(9131):837-53 doi: S0140673698070196 [pii][published Online First: Epub Date].
5. Effect of intensive blood-glucose control with metformin on complications in overweight patients with type 2 diabetes (UKPDS 34). UK Prospective Diabetes Study (UKPDS) Group. *Lancet* 1998;**352**(9131):854-65 doi: S0140673698070378 [pii][published Online First: Epub Date].
6. DCCT. The Effect of Intensive Treatment of Diabetes on the Development and Progression of Long-Term Complications in Insulin-Dependent Diabetes Mellitus. *New England Journal of Medicine* 1993;**329**(14):977-86 doi: doi:10.1056/NEJM199309303291401[published Online First: Epub Date].
7. EDIC. Epidemiology of Diabetes Interventions and Complications (EDIC). Design, implementation, and preliminary results of a long-term follow-up of the Diabetes Control and Complications Trial cohort. *Diabetes Care* 1999;**22**(1):99-111 doi: 10.2337/diacare.22.1.99[published Online First: Epub Date].
8. Boulton AJ. Lowering the risk of neuropathy, foot ulcers and amputations. *Diabet Med* 1998;**15** Suppl 4:S57-9 doi: 10.1002/(sici)1096-9136(1998120)15:4+<s57::aid-dia741>3.0.co;2-d[published Online First: Epub Date].
9. Apelqvist J, Larsson J. What is the most effective way to reduce incidence of amputation in the diabetic foot? *Diabetes/metabolism research and reviews* 2000;**16**(S1):S75-S83
10. Singh N, Armstrong DG, Lipsky BA. Preventing foot ulcers in patients with diabetes. *JAMA* 2005;**293**(2):217-28

- 1
- 2
- 3
- 4 11. IDF. Position Statement - the Diabetic Foot. Secondary Position Statement - the Diabetic Foot.  
5 <http://www.idf.org/position-statement-diabetic-foot>.
- 6
- 7 12. Adler AI, Boyko EJ, Ahroni JH, Smith DG. Lower-extremity amputation in diabetes. The  
8 independent effects of peripheral vascular disease, sensory neuropathy, and foot ulcers.  
9 *Diabetes Care* 1999;**22**(7):1029
- 10 13. Pecoraro R, Reiber G, Burgess E. Pathways to diabetic limb amputation. Basis for prevention.  
11 *Diabetes Care* 1990;**13**(5):513
- 12 14. Agardh E, Allebeck P, Hallqvist J, Moradi T, Sidorchuk A. Type 2 diabetes incidence and socio-  
13 economic position: a systematic review and meta-analysis. *International Journal of*  
14 *Epidemiology* 2011 doi: 10.1093/ije/dyr029[published Online First: Epub Date]|.
- 15 15. Mayfield J, Reiber G, Sanders L, Janisse D, Pogach L. Preventive foot care in people with diabetes.  
16 *Diabetes Care* 1998;**21**(12):2161
- 17 16. ADA. Position Statement: Preventive foot care in people with diabetes. . *Diabetes Care*  
18 1998;**21**:2178 – 79
- 19 17. ADA. Preventive Foot Care in People With Diabetes. *Diabetes Care* 2003;**26**(suppl 1):s78-s79 doi:  
20 10.2337/diacare.26.2007.S78[published Online First: Epub Date]|.
- 21 18. ADA. Standards of Medical Care in Diabetes. *Diabetes Care* 2005;**28**(suppl 1):s4-s36 doi:  
22 10.2337/diacare.28.suppl\_1.S4[published Online First: Epub Date]|.
- 23 19. Boulton AJM, Armstrong DG, Albert SF, et al. Comprehensive Foot Examination and Risk  
24 Assessment. *Diabetes Care* 2008;**31**(8):1679-85 doi: 10.2337/dc08-9021[published Online  
25 First: Epub Date]|.
- 26 20. SIGN. Management of diabetes. A national clinical guideline March 2010.  
27 <http://www.sign.ac.uk/pdf/sign116.pdf>.
- 28 21. Dorresteijn Johannes AN, Kriegsman Didi MW, Valk Gerlof D. Complex interventions for  
29 preventing diabetic foot ulceration. *Cochrane Database of Systematic Reviews* 2010; (1).  
30 <http://www.mrw.interscience.wiley.com/cochrane/clsysrev/articles/CD007610/frame.html>.
- 31 22. Dorresteijn Johannes AN, Kriegsman Didi MW, Assendelft Willem JJ, Valk Gerlof D. Patient  
32 education for preventing diabetic foot ulceration. *Cochrane Database of Systematic Reviews*  
33 2010; (5).  
34 <http://www.mrw.interscience.wiley.com/cochrane/clsysrev/articles/CD001488/frame.html>.
- 35 23. Downs SH, Black N. The feasibility of creating a checklist for the assessment of the  
36 methodological quality both of randomised and non-randomised studies of health care  
37 interventions. *Journal of Epidemiology and Community Health* 1998;**52**(6):377-84 doi:  
38 10.1136/jech.52.6.377[published Online First: Epub Date]|.
- 39
- 40
- 41
- 42
- 43
- 44
- 45
- 46
- 47
- 48
- 49
- 50
- 51
- 52
- 53
- 54
- 55
- 56
- 57
- 58
- 59
- 60

1  
2  
3  
4  
5  
6  
7  
8  
9  
10  
11  
12  
13  
14  
15  
16  
17  
18  
19  
20  
21  
22  
23  
24  
25  
26  
27  
28  
29  
30  
31  
32  
33  
34  
35  
36  
37  
38  
39  
40  
41  
42  
43  
44  
45  
46  
47  
48  
49  
50  
51  
52  
53  
54  
55  
56  
57  
58  
59  
60

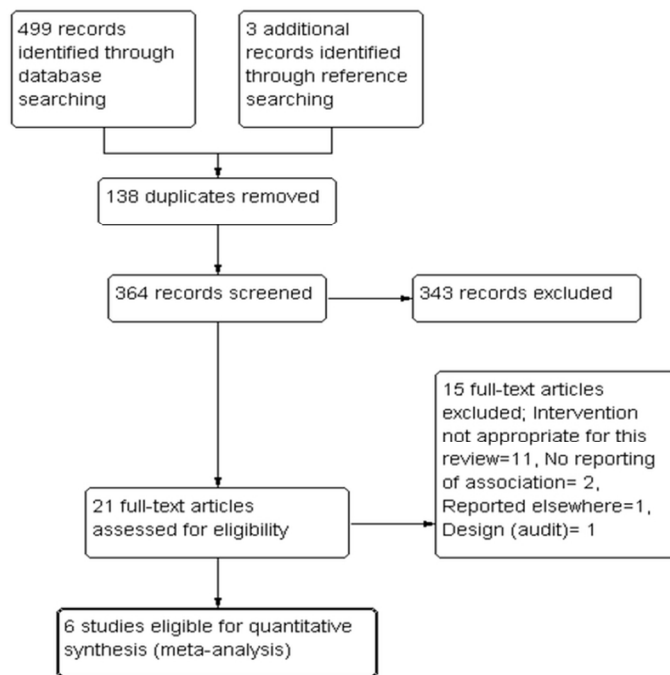

Figure 1 PRISMA flow chart: selection of studies for inclusion in review

90x116mm (300 x 300 DPI)

1  
2  
3  
4  
5  
6  
7  
8  
9  
10  
11  
12  
13  
14  
15  
16  
17  
18  
19  
20  
21  
22  
23  
24  
25  
26  
27  
28  
29  
30  
31  
32  
33  
34  
35  
36  
37  
38  
39  
40  
41  
42  
43  
44  
45  
46  
47  
48  
49  
50  
51  
52  
53  
54  
55  
56  
57  
58  
59  
60

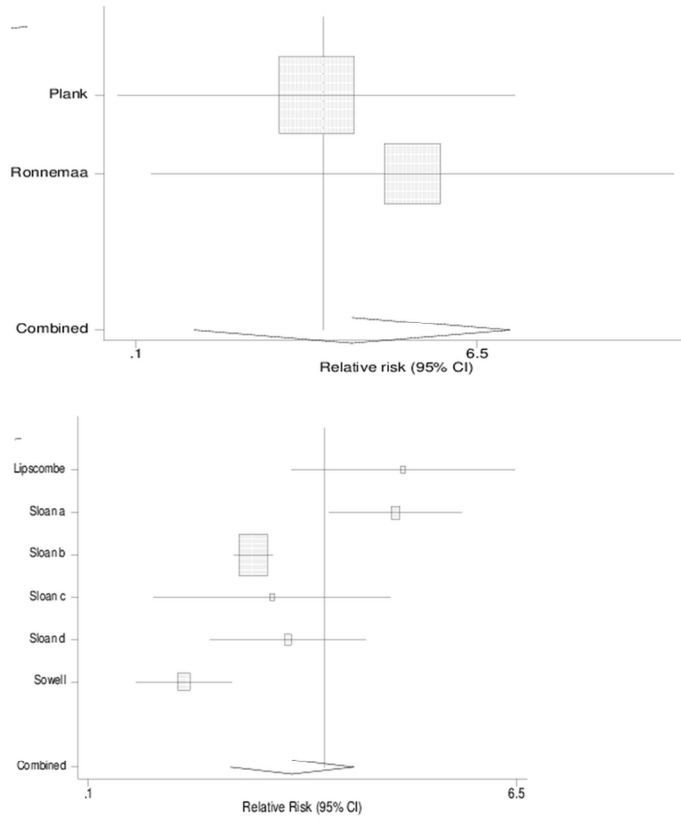

Figure 1 Forest plots of meta-analysis of RCTs (top) and Cohort studies (bottom) with the intervention of contact with a podiatrist on left side of plot

90x116mm (300 x 300 DPI)

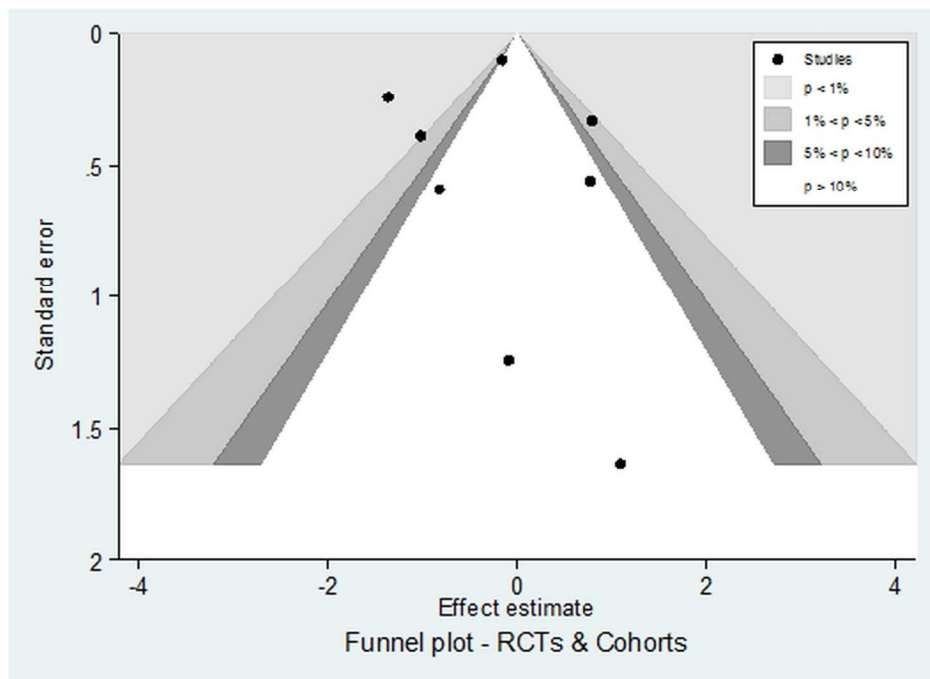

Figure 3 Funnel plot of included studies (RCTs and Cohort studies)

117x90mm (300 x 300 DPI)

Review only

1  
2  
3  
4  
5  
6  
7  
8  
9  
10  
11  
12  
13  
14  
15  
16  
17  
18  
19  
20  
21  
22  
23  
24  
25  
26  
27  
28  
29  
30  
31  
32  
33  
34  
35  
36  
37  
38  
39  
40  
41  
42  
43  
44  
45  
46  
47  
48  
49  
50  
51  
52  
53  
54  
55  
56  
57  
58  
59  
60
